# Supplementary material for: Frequency and developmental timing of linear enamel hypoplasia defects in Early Archaic Texan hunter-gatherers
Source: PeerJ. 2018 Feb 13;6:e4367. doi: 10.7717/peerj.4367 (PMC5815329; doi:10.7717/peerj.4367)
Supplement: Supplemental Information 1 — In depth data from Buckeye Knoll LEH defects only. Includes counts, and calculated timing of defects (according to Reid & Dean (2000)). [file peerj-06-4367-s001.xls]

## Sheet: Sheet1
TTYPE	XorN	RorLeft	flag_decid	TNUM	age	sex	gross_age	LEH_COUNT	CROWN_HEIG	X_COMPLETE	D1_percent_crown	DEFECT1	reverseageD1	dev_age_D1	D2_percentcrown	DEFECT2	reverseageD2	dev_age_D2	D3_percentcrown	DEFECT3	reverseageD3	dev_age_D3	D4_percentcrown	DEFECT4	reverseageD4	dev_age_D4	COMMENTS	DEFECT1AGE	DEFECT2AGE	DEFECT3AGE	DEFECT4AGE	earliest_LEH
RNC	2	1	0	2	37.6	2		2	8	80	0.25875	2.07	0.74125	4.47	0.46375	3.71	0.53625	3.29	0	0	1	#NULL!	0	0	1	#NULL!		4.47	3.29	#NULL!	#NULL!	3.29
LNC	2	2	0	3	51.49	2.5		0	8.68	100	0	0	1	#NULL!	0	0	1	#NULL!	0	0	1	#NULL!	0	0	1	#NULL!		#NULL!	#NULL!	#NULL!	#NULL!	#NULL!
LNC	2	2	0	5	22	2.5		0	7.89	100	0	0	1	#NULL!	0	0	1	#NULL!	0	0	1	#NULL!	0	0	1	#NULL!	chipped CEJ, tooth split in half	#NULL!	#NULL!	#NULL!	#NULL!	#NULL!
LNC	2	2	0	6	55.9	2.5		0	5.15	70	0	0	1	#NULL!	0	0	1	#NULL!	0	0	1	#NULL!	0	0	1	#NULL!		#NULL!	#NULL!	#NULL!	#NULL!	#NULL!
RNC	2	1	0	7	21.2	2		0	11.96	95	0	0	1	#NULL!	0	0	1	#NULL!	0	0	1	#NULL!	0	0	1	#NULL!		#NULL!	#NULL!	#NULL!	#NULL!	#NULL!
RXC	1	1	0	9	56.39	1.5		1	9.75	100	0.22359	2.18	0.77641	4.2	0	0	1	#NULL!	0	0	1	#NULL!	0	0	1	#NULL!		4.2	#NULL!	#NULL!	#NULL!	4.2
C	3	3	0	10	38.48	1		2	9.79	85	0.237998	2.33	0.762002	4.35	0.557712	5.46	0.442288	2.82	0	0	1	#NULL!	0	0	1	#NULL!		#NULL!	#NULL!	#NULL!	#NULL!	2.82
C	3	3	0	11	#NULL!	1	adult	1	9.63	80	0.542056	5.22	0.457944	2.9	0	0	1	#NULL!	0	0	1	#NULL!	0	0	1	#NULL!		#NULL!	#NULL!	#NULL!	#NULL!	2.9
RXC	1	1	0	12	20.24	1.5		0	12.08	100	0	0	1	#NULL!	0	0	1	#NULL!	0	0	1	#NULL!	0	0	1	#NULL!		#NULL!	#NULL!	#NULL!	#NULL!	#NULL!
C	3	3	0	13	48.02	2.5		0	11.03	100	0	0	1	#NULL!	0	0	1	#NULL!	0	0	1	#NULL!	0	0	1	#NULL!		#NULL!	#NULL!	#NULL!	#NULL!	#NULL!
RXC	1	1	0	14	#NULL!	#NULL!	adult	0	10.38	95	0	0	1	#NULL!	0	0	1	#NULL!	0	0	1	#NULL!	0	0	1	#NULL!	dental calculus ring	#NULL!	#NULL!	#NULL!	#NULL!	#NULL!
C	3	3	0	15	39.88	2.5		0	10.26	100	0	0	1	#NULL!	0	0	1	#NULL!	0	0	1	#NULL!	0	0	1	#NULL!		#NULL!	#NULL!	#NULL!	#NULL!	#NULL!
LC	3	2	0	16	33.34	2		0	7.83	100	0	0	1	#NULL!	0	0	1	#NULL!	0	0	1	#NULL!	0	0	1	#NULL!	chipped CEJ, deciduous	#NULL!	#NULL!	#NULL!	#NULL!	#NULL!
RXC	1	1	0	17	9	3		2	7.62	75	0.238845	1.82	0.761155	4.1	0.433071	3.3	0.566929	3.24	0	0	1	#NULL!	0	0	1	#NULL!		4.1	3.27	#NULL!	#NULL!	3.24
RNC	2	1	0	19	#NULL!	#NULL!		0	9.4	100	0	0	1	#NULL!	0	0	1	#NULL!	0	0	1	#NULL!	0	0	1	#NULL!		#NULL!	#NULL!	#NULL!	#NULL!	#NULL!
dlxc	1	2	1	61	31.68	1.5		0	5.83	100	0	0	1	#NULL!	0	0	1	#NULL!	0	0	1	#NULL!	0	0	1	#NULL!	chipped CEJ, deciduous	#NULL!	#NULL!	#NULL!	#NULL!	#NULL!
XC	1	3	0	82	#NULL!	#NULL!		0	9.52	100	0	0	1	#NULL!	0	0	1	#NULL!	0	0	1	#NULL!	0	0	1	#NULL!	side views only-split in half no visible face	#NULL!	#NULL!	#NULL!	#NULL!	#NULL!
RNC	2	1	0	112	#NULL!	#NULL!		0	8.81	80	0	0	1	#NULL!	0	0	1	#NULL!	0	0	1	#NULL!	0	0	1	#NULL!		#NULL!	#NULL!	#NULL!	#NULL!	#NULL!
drxc	1	1	1	122	#NULL!	#NULL!		0	4.49	80	0	0	1	#NULL!	0	0	1	#NULL!	0	0	1	#NULL!	0	0	1	#NULL!	deciduous, uneven wear	#NULL!	#NULL!	#NULL!	#NULL!	#NULL!
C	3	3	0	123	#NULL!	#NULL!		2	8.75	75	0.105143	0.92	0.894857	5.14	0.28	2.45	0.72	4.11	0	0	1	#NULL!	0	0	1	#NULL!		#NULL!	#NULL!	#NULL!	#NULL!	4.11
LNC	2	2	0	127	#NULL!	#NULL!		1	9.67	100	0.21303	2.06	0.78697	4.81	0	0	1	#NULL!	0	0	1	#NULL!	0	0	1	#NULL!		4.81	#NULL!	#NULL!	#NULL!	4.81
LNC	2	2	0	143	#NULL!	#NULL!		1	10.95	100	0.250228	2.74	0.749772	4.54	0	0	1	#NULL!	0	0	1	#NULL!	0	0	1	#NULL!		4.54	#NULL!	#NULL!	#NULL!	4.54
RXC	1	1	0	159	#NULL!	#NULL!		0	5.96	85	0	0	1	#NULL!	0	0	1	#NULL!	0	0	1	#NULL!	0	0	1	#NULL!		#NULL!	#NULL!	#NULL!	#NULL!	#NULL!
RNC	2	1	0	283	#NULL!	#NULL!		0	5.07	100	0	0	1	#NULL!	0	0	1	#NULL!	0	0	1	#NULL!	0	0	1	#NULL!	deciduous, strange break near CEJ	#NULL!	#NULL!	#NULL!	#NULL!	#NULL!
dlnc	2	2	1	288	#NULL!	#NULL!		0	7.5	100	0	0	1	#NULL!	0	0	1	#NULL!	0	0	1	#NULL!	0	0	1	#NULL!		#NULL!	#NULL!	#NULL!	#NULL!	#NULL!
dlnc	2	2	1	291	#NULL!	#NULL!		0	5.85	100	0	0	1	#NULL!	0	0	1	#NULL!	0	0	1	#NULL!	0	0	1	#NULL!	deciduous	#NULL!	#NULL!	#NULL!	#NULL!	#NULL!
dlxc	1	2	1	308	#NULL!	#NULL!		0	5.27	100	0	0	1	#NULL!	0	0	1	#NULL!	0	0	1	#NULL!	0	0	1	#NULL!	deciduous	#NULL!	#NULL!	#NULL!	#NULL!	#NULL!
drnc	2	1	1	311	#NULL!	#NULL!		0	4.43	100	0	0	1	#NULL!	0	0	1	#NULL!	0	0	1	#NULL!	0	0	1	#NULL!	chip near CEJ	#NULL!	#NULL!	#NULL!	#NULL!	#NULL!
drnc	2	1	1	314	#NULL!	#NULL!		0	6.69	100	0	0	1	#NULL!	0	0	1	#NULL!	0	0	1	#NULL!	0	0	1	#NULL!		#NULL!	#NULL!	#NULL!	#NULL!	#NULL!
dlnc	2	2	1	370	#NULL!	#NULL!		0	7.02	100	0	0	1	#NULL!	0	0	1	#NULL!	0	0	1	#NULL!	0	0	1	#NULL!	chips at base...	#NULL!	#NULL!	#NULL!	#NULL!	#NULL!
RXC	1	1	0	373	#NULL!	#NULL!		0	5.68374	75	0	0	1	#NULL!	0	0	1	#NULL!	0	0	1	#NULL!	0	0	1	#NULL!		#NULL!	#NULL!	#NULL!	#NULL!	#NULL!
RNC	2	1	0	375	#NULL!	#NULL!		1	5.13	70	0.196881	1.01	0.803119	4.9	0	0	1	#NULL!	0	0	1	#NULL!	0	0	1	#NULL!		4.9	#NULL!	#NULL!	#NULL!	4.9
RNC	2	1	0	387	#NULL!	#NULL!		2	10.25	100	0.192195	1.97	0.807805	4.9	0.333659	3.42	0.666341	3.97	0	0	1	#NULL!	0	0	1	#NULL!	possible cej chipping	4.95	4.02	#NULL!	#NULL!	3.97
C	3	3	0	391	#NULL!	#NULL!		1	10.98	100	0.306922	3.37	0.693078	3.95	0	0	1	#NULL!	0	0	1	#NULL!	0	0	1	#NULL!		#NULL!	#NULL!	#NULL!	#NULL!	3.95
RXC	1	1	0	400	#NULL!	#NULL!		1	8.71	100	0.173364	1.51	0.826636	4.41	0	0	1	#NULL!	0	0	1	#NULL!	0	0	1	#NULL!	chipped cej	4.47	#NULL!	#NULL!	#NULL!	4.41
C	3	3	0	#NULL!	#NULL!	#NULL!		1	9.5	75	0.306316	2.91	0.693684	3.95	0	0	1	#NULL!	0	0	1	#NULL!	0	0	1	#NULL!		#NULL!	#NULL!	#NULL!	#NULL!	3.95
dlnc	2	2	1	437	#NULL!	#NULL!		0	7.09	100	0	0	1	#NULL!	0	0	1	#NULL!	0	0	1	#NULL!	0	0	1	#NULL!		#NULL!	#NULL!	#NULL!	#NULL!	#NULL!
drnc	2	1	1	438	#NULL!	#NULL!		0	6.66	100	0	0	1	#NULL!	0	0	1	#NULL!	0	0	1	#NULL!	0	0	1	#NULL!		#NULL!	#NULL!	#NULL!	#NULL!	#NULL!
dlxc	1	2	1	445	#NULL!	#NULL!		0	5.32	80	0	0	1	#NULL!	0	0	1	#NULL!	0	0	1	#NULL!	0	0	1	#NULL!		#NULL!	#NULL!	#NULL!	#NULL!	#NULL!
dlnc	2	2	1	448	#NULL!	#NULL!		0	5.06	90	0	0	1	#NULL!	0	0	1	#NULL!	0	0	1	#NULL!	0	0	1	#NULL!		#NULL!	#NULL!	#NULL!	#NULL!	#NULL!
RNC	2	1	0	460	#NULL!	#NULL!		0	8.49	100	0	0	1	#NULL!	0	0	1	#NULL!	0	0	1	#NULL!	0	0	1	#NULL!		#NULL!	#NULL!	#NULL!	#NULL!	#NULL!
LNC	2	2	0	461	#NULL!	#NULL!		3	12.48	100	0.101763	1.27	0.898237	5.54	0.196314	2.45	0.803686	4.9	0.319712	3.99	0.680288	3.9	0	0	1	#NULL!	CEJ chipped	5.6	4.9	4.08	#NULL!	3.9
RXC	1	1	0	467	#NULL!	#NULL!		1	9.18	100	0.318083	2.92	0.681917	3.71	0	0	1	#NULL!	0	0	1	#NULL!	0	0	1	#NULL!		3.71	#NULL!	#NULL!	#NULL!	3.71
LNC	2	2	0	479	#NULL!	#NULL!		2	10.19	100	0.127576	1.3	0.872424	5.39	0.26791	2.73	0.73209	4.4	0	0	1	#NULL!	0	0	1	#NULL!		5.39	4.4	#NULL!	#NULL!	4.4
RNC	2	1	0	495	#NULL!	#NULL!		0	7.25	80	0	0	1	#NULL!	0	0	1	#NULL!	0	0	1	#NULL!	0	0	1	#NULL!	tooth split in half	#NULL!	#NULL!	#NULL!	#NULL!	#NULL!
XC	1	3	0	497	#NULL!	#NULL!		0	5.69	70	0	0	1	#NULL!	0	0	1	#NULL!	0	0	1	#NULL!	0	0	1	#NULL!	peg	#NULL!	#NULL!	#NULL!	#NULL!	#NULL!
RNC	2	1	0	507	#NULL!	#NULL!		1	11.1	100	0.269369	2.99	0.730631	4.4	0	0	1	#NULL!	0	0	1	#NULL!	0	0	1	#NULL!		4.4	#NULL!	#NULL!	#NULL!	4.4
XC	1	3	0	514	#NULL!	#NULL!		1	8.03	70	0.115816	1.33	0.884184	5.4	0	0	1	#NULL!	0	0	1	#NULL!	0	0	1	#NULL!		#NULL!	#NULL!	#NULL!	#NULL!	5.4
C	3	3	0	537	#NULL!	#NULL!		0	8.18	100	0	0	1	#NULL!	0	0	1	#NULL!	0	0	1	#NULL!	0	0	1	#NULL!	chipped CEJ	#NULL!	#NULL!	#NULL!	#NULL!	#NULL!
RNC	2	1	0	539	#NULL!	#NULL!		1	9.03	80	0.198228	1.79	0.801772	4.9	0	0	1	#NULL!	0	0	1	#NULL!	0	0	1	#NULL!		4.9	#NULL!	#NULL!	#NULL!	4.9
LNC	2	2	0	540	#NULL!	#NULL!		0	5.13	75	0	0	1	#NULL!	0	0	1	#NULL!	0	0	1	#NULL!	0	0	1	#NULL!		#NULL!	#NULL!	#NULL!	#NULL!	#NULL!
RNC	2	1	0	541	#NULL!	#NULL!		0	10.87	85	0	0	1	#NULL!	0	0	1	#NULL!	0	0	1	#NULL!	0	0	1	#NULL!		#NULL!	#NULL!	#NULL!	#NULL!	#NULL!
RNC	2	1	0	542	#NULL!	#NULL!		2	13.25	100	0.25283	3.35	0.74717	4.54	0.375849	4.98	0.624151	3.73	0	0	1	#NULL!	0	0	1	#NULL!		4.54	3.73	#NULL!	#NULL!	3.73
LNC	2	2	0	543	#NULL!	#NULL!		0	11.16	90	0	0	1	#NULL!	0	0	1	#NULL!	0	0	1	#NULL!	0	0	1	#NULL!		#NULL!	#NULL!	#NULL!	#NULL!	#NULL!
RNC	2	1	0	544	#NULL!	#NULL!		0	3.01	20	0	0	1	#NULL!	0	0	1	#NULL!	0	0	1	#NULL!	0	0	1	#NULL!		#NULL!	#NULL!	#NULL!	#NULL!	#NULL!
LNC	2	2	0	545	#NULL!	#NULL!		1	10.88	85	0.235294	2.56	0.764706	4.61	0	0	1	#NULL!	0	0	1	#NULL!	0	0	1	#NULL!		4.6	#NULL!	#NULL!	#NULL!	4.61
RNC	2	1	0	546	#NULL!	#NULL!		2	10.14	100	0.213018	2.16	0.786982	4.81	0.299803	3.04	0.700197	4.2	0	0	1	#NULL!	0	0	1	#NULL!		4.81	4.2	#NULL!	#NULL!	4.2
RXC	1	1	0	568	#NULL!	#NULL!		0	8.96	100	0	0	1	#NULL!	0	0	1	#NULL!	0	0	1	#NULL!	0	0	1	#NULL!	chipped CEJ	#NULL!	#NULL!	#NULL!	#NULL!	#NULL!
RXC	1	1	0	571	#NULL!	#NULL!		0	9.65	75	0	0	1	#NULL!	0	0	1	#NULL!	0	0	1	#NULL!	0	0	1	#NULL!		#NULL!	#NULL!	#NULL!	#NULL!	#NULL!
dlnc	2	2	1	696	#NULL!	#NULL!		0	5.1	100	0	0	1	#NULL!	0	0	1	#NULL!	0	0	1	#NULL!	0	0	1	#NULL!	deciduous	#NULL!	#NULL!	#NULL!	#NULL!	#NULL!
drxc	1	1	1	700	#NULL!	#NULL!		0	5.41	90	0	0	1	#NULL!	0	0	1	#NULL!	0	0	1	#NULL!	0	0	1	#NULL!	deciduous	#NULL!	#NULL!	#NULL!	#NULL!	#NULL!
dlxc	1	2	1	703	#NULL!	#NULL!		0	6.13	100	0	0	1	#NULL!	0	0	1	#NULL!	0	0	1	#NULL!	0	0	1	#NULL!	deciduous	#NULL!	#NULL!	#NULL!	#NULL!	#NULL!
dlnc	2	2	1	710	#NULL!	#NULL!		0	6.55	100	0	0	1	#NULL!	0	0	1	#NULL!	0	0	1	#NULL!	0	0	1	#NULL!	deciduous	#NULL!	#NULL!	#NULL!	#NULL!	#NULL!
drnc	2	1	1	711	#NULL!	#NULL!		0	5.16	100	0	0	1	#NULL!	0	0	1	#NULL!	0	0	1	#NULL!	0	0	1	#NULL!	deciduous	#NULL!	#NULL!	#NULL!	#NULL!	#NULL!
RXC	1	1	0	729	#NULL!	#NULL!		0	7.88	70	0	0	1	#NULL!	0	0	1	#NULL!	0	0	1	#NULL!	0	0	1	#NULL!		#NULL!	#NULL!	#NULL!	#NULL!	#NULL!
dlnc	2	2	1	732	#NULL!	#NULL!		0	6.14	100	0	0	1	#NULL!	0	0	1	#NULL!	0	0	1	#NULL!	0	0	1	#NULL!	deciduous	#NULL!	#NULL!	#NULL!	#NULL!	#NULL!
drnc	2	1	1	762	#NULL!	#NULL!		0	4.69	80	0	0	1	#NULL!	0	0	1	#NULL!	0	0	1	#NULL!	0	0	1	#NULL!	deciduous	#NULL!	#NULL!	#NULL!	#NULL!	#NULL!
dlnc	2	2	1	768	#NULL!	#NULL!		0	5.68	100	0	0	1	#NULL!	0	0	1	#NULL!	0	0	1	#NULL!	0	0	1	#NULL!	deciduous	#NULL!	#NULL!	#NULL!	#NULL!	#NULL!
RXC	1	1	0	784	#NULL!	#NULL!		0	11.39	100	0	0	1	#NULL!	0	0	1	#NULL!	0	0	1	#NULL!	0	0	1	#NULL!		#NULL!	#NULL!	#NULL!	#NULL!	#NULL!
RXC	1	1	0	806	#NULL!	#NULL!		0	3.96	20	0	0	1	#NULL!	0	0	1	#NULL!	0	0	1	#NULL!	0	0	1	#NULL!		#NULL!	#NULL!	#NULL!	#NULL!	#NULL!
dc	3	3	1	808	#NULL!	#NULL!		1	7.75	100	0.083871	0.65	0.916129	5.33	0	0	1	#NULL!	0	0	1	#NULL!	0	0	1	#NULL!	deciduous	#NULL!	#NULL!	#NULL!	#NULL!	5.33
RXC	1	1	0	809	#NULL!	#NULL!		1	10.65	100	0.123005	1.31	0.876995	4.68	0	0	1	#NULL!	0	0	1	#NULL!	0	0	1	#NULL!		4.3	#NULL!	#NULL!	#NULL!	4.68
dlnc	2	2	1	819	#NULL!	#NULL!		0	5.05	100	0	0	1	#NULL!	0	0	1	#NULL!	0	0	1	#NULL!	0	0	1	#NULL!	deciduous, CEJ chipped	#NULL!	#NULL!	#NULL!	#NULL!	#NULL!
drnc	2	1	1	829	#NULL!	#NULL!		0	5.69	100	0	0	1	#NULL!	0	0	1	#NULL!	0	0	1	#NULL!	0	0	1	#NULL!	deciduous	#NULL!	#NULL!	#NULL!	#NULL!	#NULL!
RNC	2	1	0	836	#NULL!	#NULL!		1	9.76	100	0.233607	2.28	0.766393	4.68	0	0	1	#NULL!	0	0	1	#NULL!	0	0	1	#NULL!		4.68	#NULL!	#NULL!	#NULL!	4.68
drnc	2	1	1	841	#NULL!	#NULL!		0	7.38	100	0	0	1	#NULL!	0	0	1	#NULL!	0	0	1	#NULL!	0	0	1	#NULL!	deciduous	#NULL!	#NULL!	#NULL!	#NULL!	#NULL!
RXC	1	1	0	847	#NULL!	#NULL!		1	9.22	70	0.165944	1.53	0.834056	4.47	0	0	1	#NULL!	0	0	1	#NULL!	0	0	1	#NULL!		#NULL!	#NULL!	#NULL!	#NULL!	4.47
RXC	1	1	0	857	#NULL!	#NULL!		0	5.7	100	0	0	1	#NULL!	0	0	1	#NULL!	0	0	1	#NULL!	0	0	1	#NULL!	deciduous, chipped CEJ	#NULL!	#NULL!	#NULL!	#NULL!	#NULL!
drnc	2	1	1	865	#NULL!	#NULL!		0	5.17	100	0	0	1	#NULL!	0	0	1	#NULL!	0	0	1	#NULL!	0	0	1	#NULL!	deciduous, strange enamel cracking	#NULL!	#NULL!	#NULL!	#NULL!	#NULL!
drxc	1	1	1	866	#NULL!	#NULL!		0	7.21	100	0	0	1	#NULL!	0	0	1	#NULL!	0	0	1	#NULL!	0	0	1	#NULL!	deciduous, unusual cracked enamel	#NULL!	#NULL!	#NULL!	#NULL!	#NULL!
dlnc	2	2	1	869	#NULL!	#NULL!		0	6.73	100	0	0	1	#NULL!	0	0	1	#NULL!	0	0	1	#NULL!	0	0	1	#NULL!	deciduous, enamel cracking	#NULL!	#NULL!	#NULL!	#NULL!	#NULL!
RXC	1	1	0	2062	#NULL!	#NULL!		1	10.44	100	0.208812	2.18	0.791188	4.25	0	0	1	#NULL!	0	0	1	#NULL!	0	0	1	#NULL!	chipped CEJ	4.25	#NULL!	#NULL!	#NULL!	4.25
RNC	2	1	0	2067	#NULL!	#NULL!		1	11.19	100	0.327971	3.67	0.672029	4.02	0	0	1	#NULL!	0	0	1	#NULL!	0	0	1	#NULL!		4.02	#NULL!	#NULL!	#NULL!	4.02
LNC	2	2	0	2068	#NULL!	#NULL!		2	12.36	100	0.0906149	1.12	0.909385	5.6	0.264563	3.27	0.735437	4.4	0	0	1	#NULL!	0	0	1	#NULL!	chipped CEJ	5.67	4.47	#NULL!	#NULL!	4.4
dlxc	1	2	1	2069	#NULL!	#NULL!		0	4.74	80	0	0	1	#NULL!	0	0	1	#NULL!	0	0	1	#NULL!	0	0	1	#NULL!		#NULL!	#NULL!	#NULL!	#NULL!	#NULL!
RXC	1	1	0	2070	#NULL!	#NULL!		2	11.7	100	0.142735	1.67	0.857265	4.57	0.238462	2.79	0.761538	4.1	0	0	1	#NULL!	0	0	1	#NULL!		4.63	4.1	#NULL!	#NULL!	4.1
drxc	1	1	1	2072	#NULL!	#NULL!		0	5.5	75	0	0	1	#NULL!	0	0	1	#NULL!	0	0	1	#NULL!	0	0	1	#NULL!		#NULL!	#NULL!	#NULL!	#NULL!	#NULL!
LNC	2	2	0	2129	#NULL!	#NULL!		0	4.05	60	0	0	1	#NULL!	0	0	1	#NULL!	0	0	1	#NULL!	0	0	1	#NULL!		#NULL!	#NULL!	#NULL!	#NULL!	#NULL!
RXC	1	1	0	2130	#NULL!	#NULL!		1	6.3	60	0.35873	2.26	0.64127	3.55	0	0	1	#NULL!	0	0	1	#NULL!	0	0	1	#NULL!	asymmetrical attrition	3.55	#NULL!	#NULL!	#NULL!	3.55
LNC	2	2	0	2137	#NULL!	#NULL!		3	11.08	100	0.184116	2.04	0.815884	5.03	0.308664	3.42	0.691336	4.14	0.487365	5.4	0.512635	3.14	0	0	1	#NULL!		5.03	4.14	3.13	#NULL!	3.14
XC	1	3	0	2145	#NULL!	#NULL!		0	3.83	30	0	0	1	#NULL!	0	0	1	#NULL!	0	0	1	#NULL!	0	0	1	#NULL!		#NULL!	#NULL!	#NULL!	#NULL!	#NULL!
LNC	2	2	0	2147	#NULL!	#NULL!		0	4.69	40	0	0	1	#NULL!	0	0	1	#NULL!	0	0	1	#NULL!	0	0	1	#NULL!		#NULL!	#NULL!	#NULL!	#NULL!	#NULL!
RC	3	1	0	2150	#NULL!	#NULL!		0	5.9	75	0	0	1	#NULL!	0	0	1	#NULL!	0	0	1	#NULL!	0	0	1	#NULL!		#NULL!	#NULL!	#NULL!	#NULL!	#NULL!
LNC	2	2	0	2160	#NULL!	#NULL!		1	10.67	90	0.334583	3.57	0.665417	3.97	0	0	1	#NULL!	0	0	1	#NULL!	0	0	1	#NULL!		4.02	#NULL!	#NULL!	#NULL!	3.97
drnc	2	1	1	2186	#NULL!	#NULL!		0	6.71	100	0	0	1	#NULL!	0	0	1	#NULL!	0	0	1	#NULL!	0	0	1	#NULL!	deciduous	#NULL!	#NULL!	#NULL!	#NULL!	#NULL!
drnc	2	1	1	2194	#NULL!	#NULL!		0	6.82	100	0	0	1	#NULL!	0	0	1	#NULL!	0	0	1	#NULL!	0	0	1	#NULL!	deciduous	#NULL!	#NULL!	#NULL!	#NULL!	#NULL!
drxc	1	1	1	2264	#NULL!	#NULL!		0	6.9	85	0	0	1	#NULL!	0	0	1	#NULL!	0	0	1	#NULL!	0	0	1	#NULL!	deciduous	#NULL!	#NULL!	#NULL!	#NULL!	#NULL!
dlxc	1	2	1	2265	#NULL!	#NULL!		0	7.03	100	0	0	1	#NULL!	0	0	1	#NULL!	0	0	1	#NULL!	0	0	1	#NULL!	deciduous	#NULL!	#NULL!	#NULL!	#NULL!	#NULL!
RXC	1	1	0	2266	#NULL!	#NULL!		0	7.51	100	0	0	1	#NULL!	0	0	1	#NULL!	0	0	1	#NULL!	0	0	1	#NULL!	deciduous	#NULL!	#NULL!	#NULL!	#NULL!	#NULL!
RXC	1	1	0	2267	#NULL!	#NULL!		1	10.54	80	0.183112	1.93	0.816888	4.41	0	0	1	#NULL!	0	0	1	#NULL!	0	0	1	#NULL!		4.41	#NULL!	#NULL!	#NULL!	4.41
dlxc	1	2	1	2269	#NULL!	#NULL!		0	5.47	80	0	0	1	#NULL!	0	0	1	#NULL!	0	0	1	#NULL!	0	0	1	#NULL!	deciduous	#NULL!	#NULL!	#NULL!	#NULL!	#NULL!
dlnc	2	2	1	2306	#NULL!	#NULL!		0	6.63	100	0	0	1	#NULL!	0	0	1	#NULL!	0	0	1	#NULL!	0	0	1	#NULL!	chipped CEJ	#NULL!	#NULL!	#NULL!	#NULL!	#NULL!
drnc	2	1	1	2307	#NULL!	#NULL!		0	6.59	100	0	0	1	#NULL!	0	0	1	#NULL!	0	0	1	#NULL!	0	0	1	#NULL!	deciduous	#NULL!	#NULL!	#NULL!	#NULL!	#NULL!
RXC	1	1	0	2308	#NULL!	#NULL!		1	10.58	80	0.181474	1.92	0.818526	4.41	0	0	1	#NULL!	0	0	1	#NULL!	0	0	1	#NULL!		4.41	#NULL!	#NULL!	#NULL!	4.41
RNC	2	1	0	2310	#NULL!	#NULL!		2	10.21	85	0.284035	2.9	0.715965	4.27	0.438786	4.48	0.561214	3.4	0	0	1	#NULL!	0	0	1	#NULL!		4.34	3.4	#NULL!	#NULL!	3.4
LNC	2	2	0	2317	#NULL!	#NULL!		1	9.09	85	0.309131	2.81	0.690869	4.14	0	0	1	#NULL!	0	0	1	#NULL!	0	0	1	#NULL!		4.14	#NULL!	#NULL!	#NULL!	4.14
RXC	1	1	0	2336	#NULL!	#NULL!		1	10.53	80	0.409307	4.31	0.590693	3.35	0	0	1	#NULL!	0	0	1	#NULL!	0	0	1	#NULL!		3.35	#NULL!	#NULL!	#NULL!	3.35
C	3	3	0	2348	#NULL!	#NULL!		3	9.35	80	0.319786	2.99	0.680214	3.9	0.480214	4.49	0.519786	3.14	0.657754	6.15	0.342246	2.48	0	0	1	#NULL!		#NULL!	#NULL!	#NULL!	#NULL!	2.48
LNC	2	2	0	2349	#NULL!	#NULL!		3	8.78	80	0.0922551	0.81	0.907745	5.67	0.183371	1.61	0.816629	5.03	0.371298	3.26	0.628702	3.79	0	0	1	#NULL!	chipped CEJ	5.67	5.03	3.79	#NULL!	3.79
dc	3	3	1	2350	#NULL!	#NULL!		0	5.73	100	0	0	1	#NULL!	0	0	1	#NULL!	0	0	1	#NULL!	0	0	1	#NULL!	chipped CEJ, decid	#NULL!	#NULL!	#NULL!	#NULL!	#NULL!
RNC	2	1	0	2360	#NULL!	#NULL!		2	9.77	85	0.254862	2.49	0.745138	4.54	0.383828	3.75	0.616172	3.73	0	0	1	#NULL!	0	0	1	#NULL!		4.54	3.73	#NULL!	#NULL!	3.73
LNC	2	2	0	2361	#NULL!	#NULL!		2	10.15	80	0.239409	2.43	0.760591	4.61	0.350739	3.56	0.649261	3.91	0	0	1	#NULL!	0	0	1	#NULL!		4.6	3.91	#NULL!	#NULL!	3.91
dlnc	2	2	1	2372	#NULL!	#NULL!		0	5.26	100	0	0	1	#NULL!	0	0	1	#NULL!	0	0	1	#NULL!	0	0	1	#NULL!	deciduous strange cracked enamel	#NULL!	#NULL!	#NULL!	#NULL!	#NULL!
RXC	1	1	0	2394	#NULL!	#NULL!		1	6.3	40	0.409524	2.58	0.590476	3.35	0	0	1	#NULL!	0	0	1	#NULL!	0	0	1	#NULL!		3.35	#NULL!	#NULL!	#NULL!	3.35
LNC	2	2	0	2395	#NULL!	#NULL!		1	2.99	30	0.561873	1.68	0.438127	2.83	0	0	1	#NULL!	0	0	1	#NULL!	0	0	1	#NULL!	CEJ obscured by calculus	2.83	#NULL!	#NULL!	#NULL!	2.83
RXC	1	1	0	2418	#NULL!	#NULL!		4	11.32	100	0.229682	2.6	0.770318	4.15	0.314488	3.56	0.685512	3.71	0.433746	4.91	0.566254	3.27	0.592756	6.71	0.407244	2.72		4.15	3.75	2.85	2.72	2.72
RXC	1	1	0	2422	#NULL!	#NULL!		1	8.72	80	0.363532	3.17	0.636468	3.55	0	0	1	#NULL!	0	0	1	#NULL!	0	0	1	#NULL!		3.55	#NULL!	#NULL!	#NULL!	3.55
RNC	2	1	0	2444	#NULL!	#NULL!		1	10.59	100	0.309726	3.28	0.690274	4.14	0	0	1	#NULL!	0	0	1	#NULL!	0	0	1	#NULL!		4.14	#NULL!	#NULL!	#NULL!	4.14
LNC	2	2	0	2445	#NULL!	#NULL!		1	9.81	100	0.328236	3.22	0.671764	4.02	0	0	1	#NULL!	0	0	1	#NULL!	0	0	1	#NULL!		4.02	#NULL!	#NULL!	#NULL!	4.02
dlxc	1	2	1	2446	#NULL!	#NULL!		0	3.99	80	0	0	1	#NULL!	0	0	1	#NULL!	0	0	1	#NULL!	0	0	1	#NULL!	deciduous	#NULL!	#NULL!	#NULL!	#NULL!	#NULL!
drxc	1	1	1	2447	#NULL!	#NULL!		0	4.72	80	0	0	1	#NULL!	0	0	1	#NULL!	0	0	1	#NULL!	0	0	1	#NULL!	decduous	#NULL!	#NULL!	#NULL!	#NULL!	#NULL!
dlnc	2	2	1	2462	#NULL!	#NULL!		0	5.48	100	0	0	1	#NULL!	0	0	1	#NULL!	0	0	1	#NULL!	0	0	1	#NULL!	deciduous?	#NULL!	#NULL!	#NULL!	#NULL!	#NULL!
RXC	1	1	0	2481	#NULL!	#NULL!		0	5.63	50	0	0	1	#NULL!	0	0	1	#NULL!	0	0	1	#NULL!	0	0	1	#NULL!		#NULL!	#NULL!	#NULL!	#NULL!	#NULL!
LNC	2	2	0	2482	#NULL!	#NULL!		0	5.1	50	0	0	1	#NULL!	0	0	1	#NULL!	0	0	1	#NULL!	0	0	1	#NULL!		#NULL!	#NULL!	#NULL!	#NULL!	#NULL!
RXC	1	1	0	2524	#NULL!	#NULL!		1	4.14	30	0.432367	1.79	0.567633	3.27	0	0	1	#NULL!	0	0	1	#NULL!	0	0	1	#NULL!		3.27	#NULL!	#NULL!	#NULL!	3.27
LNC	2	2	0	2546	#NULL!	#NULL!		2	9.21	85	0.281216	2.59	0.718784	4.33	0.427796	3.94	0.572204	3.45	0	0	1	#NULL!	0	0	1	#NULL!		4.34	3.45	#NULL!	#NULL!	3.45
LNC	2	2	0	2547	#NULL!	#NULL!		4	11.29	100	0.129318	1.46	0.870682	5.39	0.210806	2.38	0.789194	4.81	0.279008	3.15	0.720992	4.34	0.372896	4.21	0.627104	#NULL!	chipped CEJ	5.39	4.81	4.34	3.79	4.34
RXC	1	1	0	2549	#NULL!	#NULL!		0	5.76	75	0	0	1	#NULL!	0	0	1	#NULL!	0	0	1	#NULL!	0	0	1	#NULL!		#NULL!	#NULL!	#NULL!	#NULL!	#NULL!
RXC	1	1	0	4004	#NULL!	#NULL!		0	12.13	100	0	0	1	#NULL!	0	0	1	#NULL!	0	0	1	#NULL!	0	0	1	#NULL!		#NULL!	#NULL!	#NULL!	#NULL!	#NULL!
XC	1	3	0	4025	#NULL!	#NULL!		2	11.65	100	0.237768	2.77	0.762232	4.1	0.604292	7.04	0.395708	2.7	0	0	1	#NULL!	0	0	1	#NULL!		4.1	2.7	#NULL!	#NULL!	2.7
C	3	3	0	4026	#NULL!	#NULL!		4	9.55	100	0.0900524	0.86	0.909948	5.28	0.170681	1.63	0.829319	4.78	0.271204	2.59	0.728796	4.17	0.431414	4.12	0.568586	#NULL!		#NULL!	#NULL!	#NULL!	#NULL!	4.17
LXC?	1	2	0	25	38.6	1		1	8.16	80	0.207108	1.69	0.792892	4.25	0	0	1	#NULL!	0	0	1	#NULL!	0	0	1	#NULL!		4.25	#NULL!	#NULL!	#NULL!	4.25
RXC?	1	1	0	25	#NULL!	#NULL!		1	7.55	85	0.393377	2.97	0.606623	3.43	0	0	1	#NULL!	0	0	1	#NULL!	0	0	1	#NULL!		3.43	#NULL!	#NULL!	#NULL!	3.43
