# Supplementary material for: Frequency and developmental timing of linear enamel hypoplasia defects in Early Archaic Texan hunter-gatherers
Source: PeerJ. 2018 Feb 13;6:e4367. doi: 10.7717/peerj.4367 (PMC5815329; doi:10.7717/peerj.4367)
Supplement: Supplemental Information 2 — Published data (http://global.sbs.ohio-state.edu/western_hemisphere_module.htm) older than 3,000 years on average for comparative purposes with Buckeye Knoll data recoded (coding scheme available at link above along with data). Filter variable (select 1) selects for sites with average site age >3,000 years. LPI = Left permanent canine for all sites but Buckeye Knoll, where we included all canines in the analysis. [file peerj-06-4367-s002.xlsx]

## Sheet: Recovered_Sheet1
Site	ID	ancestry	SOC	LPC	site_age	filter_$
38c	A	3	344	2	#NULL!	#NULL!
38c	B	3	344	0	#NULL!	#NULL!
38c	C	2	341	0	#NULL!	#NULL!
38c	B1	2	341	0	#NULL!	#NULL!
38c	B2	2	341	0	#NULL!	#NULL!
38c	B3	2	341	1	#NULL!	#NULL!
38c	B5	2	341	2	#NULL!	#NULL!
38c	B11	2	341	1	#NULL!	#NULL!
38c	B13	2	341	0	#NULL!	#NULL!
38c	B9	6	.	0	#NULL!	#NULL!
cry	9	2	341	0	#NULL!	#NULL!
cry	14	2	341	0	#NULL!	#NULL!
cry	17	2	341	0	#NULL!	#NULL!
cry	22	2	341	2	#NULL!	#NULL!
cry	21	2	341	0	#NULL!	#NULL!
cry	18	2	341	0	#NULL!	#NULL!
cry	16	2	341	0	#NULL!	#NULL!
cry	26	2	341	0	#NULL!	#NULL!
cry	27	2	341	0	#NULL!	#NULL!
cry	34	2	341	2	#NULL!	#NULL!
cry	19	2	341	1	#NULL!	#NULL!
cry	3	2	341	1	#NULL!	#NULL!
cry	5	2	341	0	#NULL!	#NULL!
cry	29	2	341	0	#NULL!	#NULL!
cry	11	2	341	0	#NULL!	#NULL!
cry	23	2	341	0	#NULL!	#NULL!
cry	30	2	341	0	#NULL!	#NULL!
cry	7	2	341	0	#NULL!	#NULL!
cry	4	2	341	0	#NULL!	#NULL!
3C9	B1	3	343	0	#NULL!	#NULL!
3C9	BU2	3	343	0	#NULL!	#NULL!
3C9	BU3	3	343	1	#NULL!	#NULL!
3C9	BU4	3	343	2	#NULL!	#NULL!
3C9	BU5	3	343	1	#NULL!	#NULL!
3C9	BU7	3	343	1	#NULL!	#NULL!
3C9	BU8	3	343	1	#NULL!	#NULL!
3C9	BU9	3	343	0	#NULL!	#NULL!
3C9	BU10	3	343	0	#NULL!	#NULL!
3C9	BU11	3	343	0	#NULL!	#NULL!
3C9	BU12	3	343	0	#NULL!	#NULL!
3C9	BU13	3	343	0	#NULL!	#NULL!
3C9	BU14	3	343	3	#NULL!	#NULL!
3C9	BU15	3	343	1	#NULL!	#NULL!
3C9	BU16	3	343	2	#NULL!	#NULL!
3C9	BU17	3	343	0	#NULL!	#NULL!
3C9	BU18	3	343	0	#NULL!	#NULL!
3C9	DF	3	343	1	#NULL!	#NULL!
3C7	A1b	3	344	1	#NULL!	#NULL!
3C7	A2	3	344	0	#NULL!	#NULL!
3C7	A3a	3	344	1	#NULL!	#NULL!
3C7	A3b	3	344	0	#NULL!	#NULL!
3C7	A4	3	344	0	#NULL!	#NULL!
3C7	A5	3	344	2	#NULL!	#NULL!
3C7	A6	3	344	0	#NULL!	#NULL!
3C7	A7	3	344	0	#NULL!	#NULL!
3C7	A10	3	344	1	#NULL!	#NULL!
3C7	A11	3	344	2	#NULL!	#NULL!
3C7	A12	3	344	0	#NULL!	#NULL!
3C7	B1	3	344	0	#NULL!	#NULL!
3C7	B2	3	344	0	#NULL!	#NULL!
3C7	B3	3	344	0	#NULL!	#NULL!
3C7	B4a	3	344	0	#NULL!	#NULL!
3C7	B4b	3	344	0	#NULL!	#NULL!
3C7	B5	3	344	0	#NULL!	#NULL!
3C7	B6	3	344	0	#NULL!	#NULL!
3C7	B7	3	344	0	#NULL!	#NULL!
3C7	B8	3	344	0	#NULL!	#NULL!
3C7	C1	3	344	0	#NULL!	#NULL!
3C7	C2a	3	344	0	#NULL!	#NULL!
3C7	C2b	3	344	0	#NULL!	#NULL!
3C7	C4	3	344	1	#NULL!	#NULL!
3C7	D1a	3	344	1	#NULL!	#NULL!
3C7	D1b	3	344	0	#NULL!	#NULL!
3C7	D2a	3	344	0	#NULL!	#NULL!
3C7	D2b	3	344	1	#NULL!	#NULL!
3C7	D3a	3	344	0	#NULL!	#NULL!
3C7	D3b	3	344	1	#NULL!	#NULL!
3C7	D4a	3	344	0	#NULL!	#NULL!
3C7	D4b	3	344	0	#NULL!	#NULL!
3C7	D5	3	344	0	#NULL!	#NULL!
3C7	D6	3	344	0	#NULL!	#NULL!
3C7	D7	3	344	1	#NULL!	#NULL!
36B	1724	2	.	1	#NULL!	#NULL!
36B	1725	2	.	2	#NULL!	#NULL!
HOL	1	2	.	0	#NULL!	#NULL!
HOL	2	2	.	2	#NULL!	#NULL!
DAR	1	2	.	0	#NULL!	#NULL!
SAN	1	2	.	0	#NULL!	#NULL!
FAB	100	3	340	1	#NULL!	#NULL!
FAB	201	3	340	3	#NULL!	#NULL!
FAB	202	3	340	0	#NULL!	#NULL!
FAB	700	3	340	0	#NULL!	#NULL!
FAB	800	3	340	0	#NULL!	#NULL!
FAB	901	3	340	1	#NULL!	#NULL!
FAB	902	6	.	0	#NULL!	#NULL!
FAB	1000	3	340	0	#NULL!	#NULL!
FAB	1100	3	340	0	#NULL!	#NULL!
FAB	1200	6	.	0	#NULL!	#NULL!
FAB	1300	3	340	0	#NULL!	#NULL!
FAB	1400	3	340	1	#NULL!	#NULL!
FAB	1500	3	340	0	#NULL!	#NULL!
FAB	1700	3	340	0	#NULL!	#NULL!
FAB	1800	3	340	0	#NULL!	#NULL!
FAB	1900	3	340	1	#NULL!	#NULL!
FAB	2000	3	340	2	#NULL!	#NULL!
FAB	2100	3	340	1	#NULL!	#NULL!
FAB	2200	3	340	1	#NULL!	#NULL!
FAB	2300	3	340	3	#NULL!	#NULL!
FAB	2500	3	340	3	#NULL!	#NULL!
FAB	2600	3	340	0	#NULL!	#NULL!
FAB	2700	3	340	2	#NULL!	#NULL!
FAB	2800	3	340	2	#NULL!	#NULL!
FAB	2900	3	340	0	#NULL!	#NULL!
FAB	3000	3	340	1	#NULL!	#NULL!
FAB	3100	3	340	1	#NULL!	#NULL!
FAB	3200	3	340	4	#NULL!	#NULL!
FAB	3300	3	340	1	#NULL!	#NULL!
FAB	3400	3	340	1	#NULL!	#NULL!
FAB	3500	3	340	1	#NULL!	#NULL!
FAB	3600	3	340	0	#NULL!	#NULL!
FAB	3700	3	340	0	#NULL!	#NULL!
FAB	3900	3	340	0	#NULL!	#NULL!
FAB	4000	3	340	0	#NULL!	#NULL!
FAB	4100	3	340	0	#NULL!	#NULL!
FAB	4300	3	340	1	#NULL!	#NULL!
FAB	4500	3	340	2	#NULL!	#NULL!
FAB	4600	3	340	4	#NULL!	#NULL!
FAB	4700	3	340	0	#NULL!	#NULL!
FAB	4800	3	340	0	#NULL!	#NULL!
FAB	4900	3	340	2	#NULL!	#NULL!
FAB	5000	3	340	4	#NULL!	#NULL!
FAB	5100	3	340	1	#NULL!	#NULL!
FAB	5200	3	340	1	#NULL!	#NULL!
FAB	5300	3	340	#NULL!	#NULL!	#NULL!
FAB	5400	3	340	3	#NULL!	#NULL!
FAB	5500	3	340	#NULL!	#NULL!	#NULL!
FAB	5600	3	340	2	#NULL!	#NULL!
FAB	5700	3	340	2	#NULL!	#NULL!
FAB	5800	3	340	#NULL!	#NULL!	#NULL!
FAB	5900	3	340	#NULL!	#NULL!	#NULL!
FAB	6000	3	340	1	#NULL!	#NULL!
FAB	6200	3	340	#NULL!	#NULL!	#NULL!
FAB	6400	3	340	1	#NULL!	#NULL!
FAB	6500	3	340	1	#NULL!	#NULL!
FAB	6600	3	340	0	#NULL!	#NULL!
FAB	6700	3	340	#NULL!	#NULL!	#NULL!
FAB	6800	3	340	#NULL!	#NULL!	#NULL!
FAB	7000	3	340	1	#NULL!	#NULL!
FAB	7100	3	340	1	#NULL!	#NULL!
FAB	7200	3	340	#NULL!	#NULL!	#NULL!
FAB	7300	3	340	1	#NULL!	#NULL!
FAB	7400	3	340	#NULL!	#NULL!	#NULL!
FAB	7600	3	340	1	#NULL!	#NULL!
FAB	7700	3	340	3	#NULL!	#NULL!
FAB	7800	3	340	1	#NULL!	#NULL!
FAB	7900	3	340	#NULL!	#NULL!	#NULL!
FAB	8000	3	340	#NULL!	#NULL!	#NULL!
FAB	8100	3	340	1	#NULL!	#NULL!
FAB	8200	3	340	1	#NULL!	#NULL!
FAB	8300	3	340	0	#NULL!	#NULL!
FAB	8400	3	340	#NULL!	#NULL!	#NULL!
FAB	8500	3	340	0	#NULL!	#NULL!
FAB	8600	3	340	1	#NULL!	#NULL!
FAB	8700	3	340	1	#NULL!	#NULL!
FAB	8800	3	340	1	#NULL!	#NULL!
FAB	8900	3	340	#NULL!	#NULL!	#NULL!
FAB	9100	3	340	#NULL!	#NULL!	#NULL!
FAB	9200	3	340	#NULL!	#NULL!	#NULL!
FAB	9300	3	340	3	#NULL!	#NULL!
FAB	9400	3	340	1	#NULL!	#NULL!
FAB	9500	3	340	#NULL!	#NULL!	#NULL!
FAB	9600	3	340	1	#NULL!	#NULL!
FAB	9700	3	340	#NULL!	#NULL!	#NULL!
FAB	LC100	3	340	0	#NULL!	#NULL!
FAB	LC200	3	340	0	#NULL!	#NULL!
FAB	LC300	3	340	#NULL!	#NULL!	#NULL!
FAB	LC400	3	340	0	#NULL!	#NULL!
FAB	LC500	3	340	1	#NULL!	#NULL!
3La	10	3	344	3	#NULL!	#NULL!
3La	14	3	344	2	#NULL!	#NULL!
3La	15	3	344	3	#NULL!	#NULL!
3La	16	3	344	1	#NULL!	#NULL!
3La	17	3	344	0	#NULL!	#NULL!
3La	18	3	344	0	#NULL!	#NULL!
3La	19	3	344	3	#NULL!	#NULL!
3La	21	3	344	3	#NULL!	#NULL!
3La	24	3	344	3	#NULL!	#NULL!
3La	0025A	3	344	0	#NULL!	#NULL!
3La	0025B	3	344	0	#NULL!	#NULL!
3La	29	3	344	1	#NULL!	#NULL!
3La	31	3	344	3	#NULL!	#NULL!
3La	33	3	344	0	#NULL!	#NULL!
3La	34	3	344	0	#NULL!	#NULL!
3La	35	3	344	0	#NULL!	#NULL!
3La	36	3	344	0	#NULL!	#NULL!
3La	37	3	344	0	#NULL!	#NULL!
3La	38	3	344	0	#NULL!	#NULL!
3La	39	3	344	3	#NULL!	#NULL!
3La	40	3	344	0	#NULL!	#NULL!
3La	41	3	344	0	#NULL!	#NULL!
3La	42	3	344	3	#NULL!	#NULL!
3La	43	3	344	0	#NULL!	#NULL!
3La	44	3	344	0	#NULL!	#NULL!
3La	45	3	344	0	#NULL!	#NULL!
3La	47	5	344	3	#NULL!	#NULL!
3La	48	3	344	3	#NULL!	#NULL!
3La	49	3	344	0	#NULL!	#NULL!
3La	50	3	344	0	#NULL!	#NULL!
3La	52	3	344	0	#NULL!	#NULL!
3La	54	3	344	0	#NULL!	#NULL!
3La	55	3	344	3	#NULL!	#NULL!
3La	56	3	344	1	#NULL!	#NULL!
3La	57	3	344	3	#NULL!	#NULL!
3La	58	3	344	0	#NULL!	#NULL!
3La	59	3	344	1	#NULL!	#NULL!
3La	60	3	344	0	#NULL!	#NULL!
3La	61	3	344	2	#NULL!	#NULL!
3La	65	3	344	3	#NULL!	#NULL!
3La	66	3	344	0	#NULL!	#NULL!
3La	67	3	344	1	#NULL!	#NULL!
3La	68	3	344	3	#NULL!	#NULL!
3La	69	3	344	0	#NULL!	#NULL!
3La	70	3	344	3	#NULL!	#NULL!
3La	77	3	344	3	#NULL!	#NULL!
3La	78	3	344	3	#NULL!	#NULL!
3La	79	3	344	1	#NULL!	#NULL!
3La	80	3	344	0	#NULL!	#NULL!
3La	81	3	344	1	#NULL!	#NULL!
3La	82	5	344	3	#NULL!	#NULL!
3La	83	3	344	3	#NULL!	#NULL!
3La	84	3	344	3	#NULL!	#NULL!
3La	85	3	344	0	#NULL!	#NULL!
3La	86	3	344	3	#NULL!	#NULL!
3La	87	3	344	3	#NULL!	#NULL!
3La	88	3	344	3	#NULL!	#NULL!
3La	89	5	344	3	#NULL!	#NULL!
3La	90	3	344	0	#NULL!	#NULL!
3La	91	6	.	0	#NULL!	#NULL!
3La	92	5	344	3	#NULL!	#NULL!
3La	93	3	344	3	#NULL!	#NULL!
3La	94	3	344	3	#NULL!	#NULL!
3La	95	3	344	0	#NULL!	#NULL!
3La	96	3	344	3	#NULL!	#NULL!
3La	97	3	344	0	#NULL!	#NULL!
3La	100	3	344	3	#NULL!	#NULL!
3La	101	3	344	3	#NULL!	#NULL!
3La	102	3	344	3	#NULL!	#NULL!
3La	103	5	344	3	#NULL!	#NULL!
3La	104	3	344	3	#NULL!	#NULL!
3La	105	3	344	0	#NULL!	#NULL!
3La	106	3	344	0	#NULL!	#NULL!
3La	107	3	344	0	#NULL!	#NULL!
3La	108	3	344	0	#NULL!	#NULL!
3La	109	3	344	0	#NULL!	#NULL!
3La	110	3	344	0	#NULL!	#NULL!
3La	111	3	344	0	#NULL!	#NULL!
3La	112	3	344	0	#NULL!	#NULL!
3La	114	3	344	0	#NULL!	#NULL!
41D	1	3	332	0	#NULL!	#NULL!
41D	2	3	332	0	#NULL!	#NULL!
41D	3	3	333	0	#NULL!	#NULL!
41D	4	3	332	2	#NULL!	#NULL!
41D	5	3	332	0	#NULL!	#NULL!
41D	6	3	332	2	#NULL!	#NULL!
41D	7	3	332	3	#NULL!	#NULL!
41D	8	3	332	2	#NULL!	#NULL!
41D	9	3	332	0	#NULL!	#NULL!
41D	10	3	333	0	#NULL!	#NULL!
41D	11	3	332	0	#NULL!	#NULL!
41D	12	3	332	0	#NULL!	#NULL!
41D	14	3	332	0	#NULL!	#NULL!
41D	15	3	332	0	#NULL!	#NULL!
41D	16	3	332	0	#NULL!	#NULL!
41D	17	3	332	0	#NULL!	#NULL!
41D	18	3	332	0	#NULL!	#NULL!
41D	19	3	332	0	#NULL!	#NULL!
41D	20	3	332	2	#NULL!	#NULL!
41D	21	3	332	1	#NULL!	#NULL!
41D	22	3	332	2	#NULL!	#NULL!
41D	23	3	333	2	#NULL!	#NULL!
41D	24	3	333	0	#NULL!	#NULL!
41D	25	3	333	1	#NULL!	#NULL!
41D	26	3	333	2	#NULL!	#NULL!
41D	27	3	332	1	#NULL!	#NULL!
41D	28	3	332	3	#NULL!	#NULL!
41D	29	3	332	0	#NULL!	#NULL!
41D	30	3	332	2	#NULL!	#NULL!
41D	31	3	332	3	#NULL!	#NULL!
41D	32	3	332	3	#NULL!	#NULL!
41D	33	3	332	2	#NULL!	#NULL!
41D	34	3	332	2	#NULL!	#NULL!
41D	35	3	332	3	#NULL!	#NULL!
41D	36	3	332	2	#NULL!	#NULL!
41D	37	3	332	0	#NULL!	#NULL!
41D	38	3	332	0	#NULL!	#NULL!
41D	39	3	332	0	#NULL!	#NULL!
41D	40	3	333	0	#NULL!	#NULL!
41D	41	3	332	2	#NULL!	#NULL!
41D	42	3	332	2	#NULL!	#NULL!
41D	43	3	332	1	#NULL!	#NULL!
41D	44	3	333	1	#NULL!	#NULL!
41D	45	3	332	0	#NULL!	#NULL!
41D	46	3	332	0	#NULL!	#NULL!
41D	47	3	333	0	#NULL!	#NULL!
41D	48	3	333	0	#NULL!	#NULL!
41D	49	3	332	3	#NULL!	#NULL!
41D	51	3	332	0	#NULL!	#NULL!
41D	52	3	332	1	#NULL!	#NULL!
41D	53	3	332	1	#NULL!	#NULL!
41D	54	3	332	1	#NULL!	#NULL!
41D	55	3	332	0	#NULL!	#NULL!
41D	58	3	332	0	#NULL!	#NULL!
41D	61	3	332	2	#NULL!	#NULL!
41D	62	3	332	1	#NULL!	#NULL!
41D	64	3	332	2	#NULL!	#NULL!
41D	65	3	332	1	#NULL!	#NULL!
41D	66	3	332	0	#NULL!	#NULL!
41D	67	3	332	0	#NULL!	#NULL!
41D	68	3	332	2	#NULL!	#NULL!
41D	70	3	332	3	#NULL!	#NULL!
41D	71	3	332	1	#NULL!	#NULL!
41D	73	3	332	2	#NULL!	#NULL!
41D	74	3	332	0	#NULL!	#NULL!
41D	75	3	332	2	#NULL!	#NULL!
41D	76	3	332	0	#NULL!	#NULL!
41D	79	3	332	0	#NULL!	#NULL!
41D	80	3	332	0	#NULL!	#NULL!
41D	81	3	332	0	#NULL!	#NULL!
41D	83	3	332	0	#NULL!	#NULL!
41D	84	3	332	0	#NULL!	#NULL!
41D	85	3	332	2	#NULL!	#NULL!
41D	86	3	332	1	#NULL!	#NULL!
41D	88	3	332	3	#NULL!	#NULL!
41D	89	3	332	3	#NULL!	#NULL!
41D	90	3	333	3	#NULL!	#NULL!
41D	91	3	332	0	#NULL!	#NULL!
41D	92	3	332	0	#NULL!	#NULL!
41D	93	3	332	0	#NULL!	#NULL!
41D	94	3	332	1	#NULL!	#NULL!
41D	95	3	332	1	#NULL!	#NULL!
41D	96	3	332	3	#NULL!	#NULL!
41D	97	3	332	2	#NULL!	#NULL!
41D	98	3	332	1	#NULL!	#NULL!
41D	99	3	332	3	#NULL!	#NULL!
41D	100	3	332	1	#NULL!	#NULL!
41D	101	3	332	0	#NULL!	#NULL!
41D	102	3	332	3	#NULL!	#NULL!
41D	103	3	332	0	#NULL!	#NULL!
41D	106	3	332	3	#NULL!	#NULL!
41D	108	3	332	1	#NULL!	#NULL!
41D	110	3	332	2	#NULL!	#NULL!
41D	111	3	333	0	#NULL!	#NULL!
41D	112	3	332	2	#NULL!	#NULL!
41D	113	3	332	1	#NULL!	#NULL!
41D	115	3	332	1	#NULL!	#NULL!
41D	116	3	332	0	#NULL!	#NULL!
41D	117	3	332	0	#NULL!	#NULL!
41D	118	3	332	2	#NULL!	#NULL!
41D	119	3	332	0	#NULL!	#NULL!
41D	120	3	332	3	#NULL!	#NULL!
41D	121	3	332	0	#NULL!	#NULL!
41D	122	3	332	0	#NULL!	#NULL!
41D	123	3	332	0	#NULL!	#NULL!
41D	125	3	332	1	#NULL!	#NULL!
41D	126	3	332	2	#NULL!	#NULL!
41D	127	3	332	1	#NULL!	#NULL!
41D	128	3	332	0	#NULL!	#NULL!
41D	129	3	332	2	#NULL!	#NULL!
41D	130	3	332	0	#NULL!	#NULL!
41D	131	3	333	1	#NULL!	#NULL!
41D	132	3	333	1	#NULL!	#NULL!
41D	133	3	333	3	#NULL!	#NULL!
41D	134	3	332	1	#NULL!	#NULL!
41D	135	3	332	0	#NULL!	#NULL!
41D	136	3	332	0	#NULL!	#NULL!
41D	137	3	332	0	#NULL!	#NULL!
41D	138	3	333	3	#NULL!	#NULL!
41D	139	3	332	0	#NULL!	#NULL!
41D	140	3	332	2	#NULL!	#NULL!
41D	0141A	3	332	1	#NULL!	#NULL!
41D	0141B	3	332	0	#NULL!	#NULL!
41D	145	3	332	1	#NULL!	#NULL!
41D	146	3	332	0	#NULL!	#NULL!
41D	147	3	332	2	#NULL!	#NULL!
41D	149	3	332	1	#NULL!	#NULL!
41D	150	3	333	0	#NULL!	#NULL!
41D	151	3	332	0	#NULL!	#NULL!
41D	152	3	332	0	#NULL!	#NULL!
41D	153	3	332	0	#NULL!	#NULL!
41D	154	3	332	0	#NULL!	#NULL!
41D	155	3	332	0	#NULL!	#NULL!
41D	156	3	332	0	#NULL!	#NULL!
41D	157	3	332	1	#NULL!	#NULL!
41D	158	3	332	2	#NULL!	#NULL!
41D	162	3	332	0	#NULL!	#NULL!
41D	164	3	332	1	#NULL!	#NULL!
41D	165	3	332	0	#NULL!	#NULL!
41D	166	3	332	2	#NULL!	#NULL!
41D	171	3	332	2	#NULL!	#NULL!
41D	173	3	333	0	#NULL!	#NULL!
41D	174	3	332	1	#NULL!	#NULL!
41D	178	3	332	2	#NULL!	#NULL!
41D	184	3	332	3	#NULL!	#NULL!
41D	185	3	332	0	#NULL!	#NULL!
41D	190	3	332	2	#NULL!	#NULL!
41D	191	3	332	1	#NULL!	#NULL!
41D	192	3	332	0	#NULL!	#NULL!
41D	194	3	332	2	#NULL!	#NULL!
41D	197	3	332	2	#NULL!	#NULL!
41D	198	3	332	1	#NULL!	#NULL!
41D	199	3	332	3	#NULL!	#NULL!
41D	200	3	332	0	#NULL!	#NULL!
41D	201	3	332	1	#NULL!	#NULL!
41D	204	3	332	2	#NULL!	#NULL!
41D	205	3	332	0	#NULL!	#NULL!
41D	209	3	332	2	#NULL!	#NULL!
41D	210	3	332	0	#NULL!	#NULL!
41D	211	3	332	2	#NULL!	#NULL!
41D	212	3	332	0	#NULL!	#NULL!
41D	213	3	332	0	#NULL!	#NULL!
41D	216	3	332	2	#NULL!	#NULL!
41D	217	3	332	1	#NULL!	#NULL!
41D	218	3	332	2	#NULL!	#NULL!
41D	219	3	332	0	#NULL!	#NULL!
41D	220	3	332	1	#NULL!	#NULL!
41D	221	3	332	1	#NULL!	#NULL!
41D	222	3	332	2	#NULL!	#NULL!
41D	223	3	332	1	#NULL!	#NULL!
41D	224	3	332	0	#NULL!	#NULL!
41D	225	3	332	1	#NULL!	#NULL!
41D	226	3	332	1	#NULL!	#NULL!
41D	227	3	332	3	#NULL!	#NULL!
41D	228	3	332	2	#NULL!	#NULL!
41D	229	3	332	0	#NULL!	#NULL!
41D	230	3	332	2	#NULL!	#NULL!
41D	231	3	332	0	#NULL!	#NULL!
41D	232	3	332	3	#NULL!	#NULL!
41D	233	3	332	2	#NULL!	#NULL!
41D	234	3	332	0	#NULL!	#NULL!
41D	235	3	332	0	#NULL!	#NULL!
41D	236	3	332	0	#NULL!	#NULL!
41D	237	3	332	3	#NULL!	#NULL!
41D	238	3	332	2	#NULL!	#NULL!
41D	239	3	332	0	#NULL!	#NULL!
41D	240	3	332	2	#NULL!	#NULL!
41D	241	3	332	1	#NULL!	#NULL!
41D	242	3	332	1	#NULL!	#NULL!
41D	243	3	332	2	#NULL!	#NULL!
41D	244	3	332	0	#NULL!	#NULL!
41D	245	3	332	3	#NULL!	#NULL!
41D	246	3	332	1	#NULL!	#NULL!
41D	247	3	332	2	#NULL!	#NULL!
41D	248	3	332	2	#NULL!	#NULL!
41D	253	3	332	0	#NULL!	#NULL!
41D	255	3	332	3	#NULL!	#NULL!
41D	256	3	332	0	#NULL!	#NULL!
41D	260	3	332	0	#NULL!	#NULL!
41D	261	3	332	0	#NULL!	#NULL!
41D	262	3	332	1	#NULL!	#NULL!
41D	263	3	332	0	#NULL!	#NULL!
41D	264	3	332	1	#NULL!	#NULL!
41D	265	3	332	2	#NULL!	#NULL!
41D	266	3	332	1	#NULL!	#NULL!
41D	267	3	332	3	#NULL!	#NULL!
41D	268	3	332	3	#NULL!	#NULL!
41D	269	3	332	0	#NULL!	#NULL!
41D	270	3	332	2	#NULL!	#NULL!
41D	271	3	332	2	#NULL!	#NULL!
41D	272	3	332	1	#NULL!	#NULL!
41D	273	3	332	0	#NULL!	#NULL!
41D	274	3	332	0	#NULL!	#NULL!
41D	275	3	332	0	#NULL!	#NULL!
41D	276	3	332	2	#NULL!	#NULL!
41D	277	3	332	0	#NULL!	#NULL!
41D	278	3	332	0	#NULL!	#NULL!
41D	279	3	332	0	#NULL!	#NULL!
41D	280	3	332	0	#NULL!	#NULL!
41D	283	3	332	2	#NULL!	#NULL!
41D	285	3	332	0	#NULL!	#NULL!
41D	286	3	332	3	#NULL!	#NULL!
41D	287	3	332	1	#NULL!	#NULL!
41D	288	3	332	0	#NULL!	#NULL!
41D	289	3	332	2	#NULL!	#NULL!
41D	290	3	332	2	#NULL!	#NULL!
41D	301	3	332	1	#NULL!	#NULL!
41D	302	3	332	0	#NULL!	#NULL!
41D	303	3	332	1	#NULL!	#NULL!
41D	305	3	333	3	#NULL!	#NULL!
41D	306	3	332	0	#NULL!	#NULL!
41D	307	3	332	0	#NULL!	#NULL!
41D	310	3	332	0	#NULL!	#NULL!
41D	311	3	332	0	#NULL!	#NULL!
41D	312	3	332	2	#NULL!	#NULL!
41D	313	3	332	2	#NULL!	#NULL!
41D	314	3	332	1	#NULL!	#NULL!
41D	315	3	332	0	#NULL!	#NULL!
41D	316	3	332	0	#NULL!	#NULL!
41D	317	3	332	2	#NULL!	#NULL!
41D	319	3	333	0	#NULL!	#NULL!
41D	320	3	332	2	#NULL!	#NULL!
41D	321	3	332	0	#NULL!	#NULL!
41D	322	3	332	0	#NULL!	#NULL!
41D	323	3	332	3	#NULL!	#NULL!
41D	324	3	332	1	#NULL!	#NULL!
41D	325	3	332	0	#NULL!	#NULL!
41D	326	3	333	1	#NULL!	#NULL!
41D	327	3	332	3	#NULL!	#NULL!
41D	328	3	332	2	#NULL!	#NULL!
41D	329	3	332	1	#NULL!	#NULL!
41D	330	3	332	2	#NULL!	#NULL!
41D	331	3	332	2	#NULL!	#NULL!
41D	332	3	332	0	#NULL!	#NULL!
41D	333	3	332	3	#NULL!	#NULL!
41D	334	3	332	0	#NULL!	#NULL!
41D	335	3	332	0	#NULL!	#NULL!
41D	336	3	332	1	#NULL!	#NULL!
41D	337	3	332	3	#NULL!	#NULL!
41D	338	3	332	0	#NULL!	#NULL!
41D	341	3	332	1	#NULL!	#NULL!
41D	342	3	332	0	#NULL!	#NULL!
41D	343	3	332	0	#NULL!	#NULL!
41D	345	3	332	0	#NULL!	#NULL!
41D	346	3	332	0	#NULL!	#NULL!
41D	347	3	332	0	#NULL!	#NULL!
41D	348	3	332	3	#NULL!	#NULL!
41D	349	3	333	0	#NULL!	#NULL!
41D	350	3	332	2	#NULL!	#NULL!
41D	351	3	332	0	#NULL!	#NULL!
41D	352	3	332	0	#NULL!	#NULL!
41D	353	3	332	1	#NULL!	#NULL!
41D	354	3	332	3	#NULL!	#NULL!
41D	355	3	333	2	#NULL!	#NULL!
41D	356	3	332	0	#NULL!	#NULL!
41D	357	3	332	0	#NULL!	#NULL!
41D	358	3	332	1	#NULL!	#NULL!
41D	359	3	332	1	#NULL!	#NULL!
41D	360	3	332	1	#NULL!	#NULL!
41D	361	3	333	1	#NULL!	#NULL!
41D	362	3	332	3	#NULL!	#NULL!
41D	363	3	332	1	#NULL!	#NULL!
41D	364	3	332	1	#NULL!	#NULL!
41D	365	3	332	0	#NULL!	#NULL!
41D	366	3	332	0	#NULL!	#NULL!
41D	367	3	332	0	#NULL!	#NULL!
41D	368	3	332	0	#NULL!	#NULL!
41D	370	3	332	0	#NULL!	#NULL!
41D	371	3	332	0	#NULL!	#NULL!
41D	373	3	332	0	#NULL!	#NULL!
41D	374	3	332	0	#NULL!	#NULL!
41D	375	3	332	0	#NULL!	#NULL!
41D	377	3	332	2	#NULL!	#NULL!
41D	378	3	332	0	#NULL!	#NULL!
41D	383	3	332	3	#NULL!	#NULL!
41D	384	3	332	0	#NULL!	#NULL!
41D	385	3	332	1	#NULL!	#NULL!
41D	387	3	332	1	#NULL!	#NULL!
41D	389	3	332	0	#NULL!	#NULL!
41D	392	3	332	2	#NULL!	#NULL!
41D	394	3	332	1	#NULL!	#NULL!
41D	395	3	332	1	#NULL!	#NULL!
41D	396	3	332	1	#NULL!	#NULL!
41D	398	3	332	1	#NULL!	#NULL!
41D	403	3	332	0	#NULL!	#NULL!
41D	405	3	333	0	#NULL!	#NULL!
41D	407	3	332	0	#NULL!	#NULL!
41D	408	3	333	0	#NULL!	#NULL!
41D	409	3	332	0	#NULL!	#NULL!
41D	410	3	332	0	#NULL!	#NULL!
41D	411	3	332	0	#NULL!	#NULL!
41D	412	3	333	1	#NULL!	#NULL!
41D	413	3	332	1	#NULL!	#NULL!
41D	414	3	332	1	#NULL!	#NULL!
41D	415	3	332	2	#NULL!	#NULL!
41D	416	3	332	3	#NULL!	#NULL!
41D	417	3	332	3	#NULL!	#NULL!
41D	418	3	332	3	#NULL!	#NULL!
41D	419	3	332	1	#NULL!	#NULL!
41D	421	3	333	2	#NULL!	#NULL!
41D	0422A	3	332	1	#NULL!	#NULL!
41D	0422B	3	332	0	#NULL!	#NULL!
41D	423	3	332	0	#NULL!	#NULL!
41D	425	3	332	3	#NULL!	#NULL!
41D	426	3	332	1	#NULL!	#NULL!
41D	427	3	332	0	#NULL!	#NULL!
41D	428	3	332	1	#NULL!	#NULL!
41D	429	3	332	1	#NULL!	#NULL!
41D	430	3	333	0	#NULL!	#NULL!
41D	431	3	332	1	#NULL!	#NULL!
41D	432	3	332	1	#NULL!	#NULL!
41D	433	3	332	2	#NULL!	#NULL!
41D	435	3	332	0	#NULL!	#NULL!
41D	440	3	332	0	#NULL!	#NULL!
41D	441	3	332	3	#NULL!	#NULL!
41D	442	3	332	3	#NULL!	#NULL!
41D	443	3	332	0	#NULL!	#NULL!
41D	444	3	333	3	#NULL!	#NULL!
41D	445	3	332	1	#NULL!	#NULL!
41D	446	3	332	1	#NULL!	#NULL!
41D	448	3	332	0	#NULL!	#NULL!
41D	449	3	332	3	#NULL!	#NULL!
41D	451	3	332	0	#NULL!	#NULL!
41D	452	3	332	1	#NULL!	#NULL!
41D	458	3	332	2	#NULL!	#NULL!
41D	459	3	332	3	#NULL!	#NULL!
41D	460	3	332	2	#NULL!	#NULL!
41D	461	3	332	0	#NULL!	#NULL!
41D	462	3	332	0	#NULL!	#NULL!
41D	463	3	332	2	#NULL!	#NULL!
41D	464	3	332	0	#NULL!	#NULL!
41D	466	3	332	2	#NULL!	#NULL!
41D	467	3	332	2	#NULL!	#NULL!
41D	468	3	332	2	#NULL!	#NULL!
41D	469	3	332	3	#NULL!	#NULL!
41D	470	3	332	1	#NULL!	#NULL!
41D	471	3	333	2	#NULL!	#NULL!
41D	472	3	332	3	#NULL!	#NULL!
41D	473	3	333	0	#NULL!	#NULL!
41D	474	3	332	1	#NULL!	#NULL!
41D	476	3	332	1	#NULL!	#NULL!
41D	477	3	333	0	#NULL!	#NULL!
41D	478	3	332	0	#NULL!	#NULL!
41D	479	3	333	0	#NULL!	#NULL!
41D	480	3	332	2	#NULL!	#NULL!
41D	481	3	332	1	#NULL!	#NULL!
41D	482	3	332	0	#NULL!	#NULL!
41D	483	3	332	1	#NULL!	#NULL!
41D	485	3	332	0	#NULL!	#NULL!
41D	486	3	332	2	#NULL!	#NULL!
41D	487	3	333	2	#NULL!	#NULL!
41D	488	3	332	2	#NULL!	#NULL!
41D	489	3	332	0	#NULL!	#NULL!
41D	490	3	332	1	#NULL!	#NULL!
41D	491	3	333	2	#NULL!	#NULL!
41D	492	3	332	0	#NULL!	#NULL!
41D	494	3	332	0	#NULL!	#NULL!
41D	495	3	332	3	#NULL!	#NULL!
41D	496	3	332	1	#NULL!	#NULL!
41D	497	3	333	3	#NULL!	#NULL!
41D	498	3	332	1	#NULL!	#NULL!
41D	499	3	332	3	#NULL!	#NULL!
41D	504	3	332	2	#NULL!	#NULL!
41D	506	3	332	1	#NULL!	#NULL!
41D	511	3	332	1	#NULL!	#NULL!
41D	513	3	332	1	#NULL!	#NULL!
41D	514	3	333	1	#NULL!	#NULL!
41D	515	3	333	1	#NULL!	#NULL!
41D	519	3	333	3	#NULL!	#NULL!
41D	520	3	333	2	#NULL!	#NULL!
41D	521	3	332	0	#NULL!	#NULL!
41D	523	3	332	3	#NULL!	#NULL!
41D	525	3	332	0	#NULL!	#NULL!
41D	526	3	332	0	#NULL!	#NULL!
41D	527	3	332	0	#NULL!	#NULL!
41D	529	3	332	2	#NULL!	#NULL!
41D	530	3	332	3	#NULL!	#NULL!
41D	533	3	332	1	#NULL!	#NULL!
41D	537	3	332	2	#NULL!	#NULL!
41D	540	3	332	1	#NULL!	#NULL!
41D	542	3	332	3	#NULL!	#NULL!
41D	544	3	332	1	#NULL!	#NULL!
41D	545	3	332	3	#NULL!	#NULL!
41D	546	3	332	0	#NULL!	#NULL!
41D	549	3	332	0	#NULL!	#NULL!
41D	550	3	332	0	#NULL!	#NULL!
41D	551	3	332	0	#NULL!	#NULL!
41D	552	3	332	0	#NULL!	#NULL!
41D	553	3	332	1	#NULL!	#NULL!
41D	556	3	333	3	#NULL!	#NULL!
41D	557	3	333	1	#NULL!	#NULL!
41D	0558A	3	333	2	#NULL!	#NULL!
41D	0558B	3	333	0	#NULL!	#NULL!
41D	560	3	333	3	#NULL!	#NULL!
41D	561	3	333	0	#NULL!	#NULL!
41D	562	3	333	1	#NULL!	#NULL!
41D	563	3	333	3	#NULL!	#NULL!
41D	564	3	332	1	#NULL!	#NULL!
41D	565	3	332	2	#NULL!	#NULL!
41D	566	3	332	0	#NULL!	#NULL!
41D	567	3	332	0	#NULL!	#NULL!
41D	568	3	333	1	#NULL!	#NULL!
41D	569	3	332	0	#NULL!	#NULL!
41D	570	3	332	0	#NULL!	#NULL!
41D	571	3	333	0	#NULL!	#NULL!
41D	573	3	332	0	#NULL!	#NULL!
41D	574	3	332	1	#NULL!	#NULL!
41D	577	3	333	1	#NULL!	#NULL!
41D	578	3	332	1	#NULL!	#NULL!
41D	579	3	332	0	#NULL!	#NULL!
41D	580	3	333	0	#NULL!	#NULL!
41D	582	3	333	0	#NULL!	#NULL!
41D	583	3	333	0	#NULL!	#NULL!
41D	584	3	333	1	#NULL!	#NULL!
41D	585	3	332	0	#NULL!	#NULL!
41D	586	3	332	0	#NULL!	#NULL!
41D	587	3	332	1	#NULL!	#NULL!
41D	588	3	332	2	#NULL!	#NULL!
41D	589	3	333	0	#NULL!	#NULL!
41D	591	3	332	0	#NULL!	#NULL!
41D	592	3	333	0	#NULL!	#NULL!
41D	593	3	332	0	#NULL!	#NULL!
41D	594	3	332	3	#NULL!	#NULL!
41D	597	3	333	0	#NULL!	#NULL!
41D	598	3	332	3	#NULL!	#NULL!
41D	599	3	332	1	#NULL!	#NULL!
41D	600	3	333	2	#NULL!	#NULL!
41D	603	3	332	2	#NULL!	#NULL!
41D	608	3	332	0	#NULL!	#NULL!
41D	612	3	332	1	#NULL!	#NULL!
41D	616	3	332	2	#NULL!	#NULL!
41D	618	3	332	0	#NULL!	#NULL!
41D	624	3	332	3	#NULL!	#NULL!
41D	630	3	332	0	#NULL!	#NULL!
41D	631	3	332	0	#NULL!	#NULL!
41D	634	3	332	0	#NULL!	#NULL!
41D	635	3	333	3	#NULL!	#NULL!
41D	642	3	332	2	#NULL!	#NULL!
41D	643	3	333	1	#NULL!	#NULL!
41D	645	3	332	2	#NULL!	#NULL!
41D	648	3	333	0	#NULL!	#NULL!
41D	650	3	332	0	#NULL!	#NULL!
41D	651	3	332	0	#NULL!	#NULL!
41D	653	3	333	2	#NULL!	#NULL!
41D	655	3	332	0	#NULL!	#NULL!
41D	656	3	332	0	#NULL!	#NULL!
41D	657	3	332	1	#NULL!	#NULL!
41D	658	3	332	2	#NULL!	#NULL!
41D	659	3	332	1	#NULL!	#NULL!
41D	662	3	332	0	#NULL!	#NULL!
41D	668	3	332	0	#NULL!	#NULL!
41D	669	3	333	0	#NULL!	#NULL!
41D	670	3	332	1	#NULL!	#NULL!
41D	671	3	332	0	#NULL!	#NULL!
41D	672	3	333	1	#NULL!	#NULL!
41D	675	3	332	0	#NULL!	#NULL!
41D	679	3	332	3	#NULL!	#NULL!
41D	680	3	333	1	#NULL!	#NULL!
41D	683	3	332	0	#NULL!	#NULL!
41D	685	3	332	0	#NULL!	#NULL!
41D	686	3	332	0	#NULL!	#NULL!
41D	687	3	332	0	#NULL!	#NULL!
41D	689	3	332	0	#NULL!	#NULL!
41D	691	3	332	0	#NULL!	#NULL!
41D	698	3	332	0	#NULL!	#NULL!
41D	705	3	333	0	#NULL!	#NULL!
41D	706	3	332	0	#NULL!	#NULL!
41D	708	3	332	0	#NULL!	#NULL!
41D	709	3	333	0	#NULL!	#NULL!
41D	710	3	333	3	#NULL!	#NULL!
41D	711	3	332	1	#NULL!	#NULL!
41D	720	3	332	0	#NULL!	#NULL!
41D	724	3	332	0	#NULL!	#NULL!
41D	726	3	332	0	#NULL!	#NULL!
41D	735	3	332	0	#NULL!	#NULL!
41D	736	3	332	0	#NULL!	#NULL!
41D	738	3	332	0	#NULL!	#NULL!
41D	739	3	332	0	#NULL!	#NULL!
41D	742	3	332	0	#NULL!	#NULL!
41D	744	3	332	0	#NULL!	#NULL!
41D	746	3	333	0	#NULL!	#NULL!
41D	750	3	332	1	#NULL!	#NULL!
41D	751	3	332	0	#NULL!	#NULL!
41D	755	3	332	0	#NULL!	#NULL!
41D	756	3	332	2	#NULL!	#NULL!
41D	757	3	332	2	#NULL!	#NULL!
41D	758	3	332	1	#NULL!	#NULL!
41D	763	3	332	0	#NULL!	#NULL!
41D	764	3	332	2	#NULL!	#NULL!
41D	765	3	332	0	#NULL!	#NULL!
41D	767	3	332	0	#NULL!	#NULL!
41D	768	3	333	0	#NULL!	#NULL!
41D	769	3	332	1	#NULL!	#NULL!
41D	771	3	332	0	#NULL!	#NULL!
41D	773	3	332	3	#NULL!	#NULL!
41D	774	3	332	0	#NULL!	#NULL!
41D	775	3	332	0	#NULL!	#NULL!
41D	778	3	332	1	#NULL!	#NULL!
41D	779	3	332	0	#NULL!	#NULL!
41D	780	3	332	1	#NULL!	#NULL!
41D	781	3	332	1	#NULL!	#NULL!
41D	784	3	332	3	#NULL!	#NULL!
41D	785	3	332	2	#NULL!	#NULL!
41D	786	3	332	0	#NULL!	#NULL!
41D	787	3	332	0	#NULL!	#NULL!
41D	789	3	332	0	#NULL!	#NULL!
41D	791	3	332	0	#NULL!	#NULL!
41D	794	3	332	1	#NULL!	#NULL!
41D	795	3	332	0	#NULL!	#NULL!
41D	797	3	333	0	#NULL!	#NULL!
41D	798	3	332	3	#NULL!	#NULL!
41D	799	3	332	0	#NULL!	#NULL!
41D	800	3	332	1	#NULL!	#NULL!
41D	801	3	332	3	#NULL!	#NULL!
41D	802	3	332	1	#NULL!	#NULL!
41D	803	3	332	0	#NULL!	#NULL!
41D	804	3	332	0	#NULL!	#NULL!
41D	805	3	332	3	#NULL!	#NULL!
41D	806	3	332	0	#NULL!	#NULL!
41D	807	3	332	0	#NULL!	#NULL!
41D	808	3	332	0	#NULL!	#NULL!
41D	809	3	332	1	#NULL!	#NULL!
41D	810	3	332	0	#NULL!	#NULL!
41D	811	3	332	0	#NULL!	#NULL!
41D	812	3	332	3	#NULL!	#NULL!
41D	813	3	332	0	#NULL!	#NULL!
41D	814	3	332	0	#NULL!	#NULL!
41D	0815A	3	333	1	#NULL!	#NULL!
41D	0815B	3	333	0	#NULL!	#NULL!
41D	816	3	332	0	#NULL!	#NULL!
41D	817	3	332	2	#NULL!	#NULL!
41D	818	3	332	1	#NULL!	#NULL!
41D	819	3	332	2	#NULL!	#NULL!
41D	820	3	332	0	#NULL!	#NULL!
41D	821	3	332	2	#NULL!	#NULL!
41D	825	3	332	1	#NULL!	#NULL!
41D	826	3	332	1	#NULL!	#NULL!
41D	827	3	332	0	#NULL!	#NULL!
41D	828	3	332	0	#NULL!	#NULL!
41D	829	3	332	2	#NULL!	#NULL!
41D	830	3	332	2	#NULL!	#NULL!
41D	831	3	332	3	#NULL!	#NULL!
41D	832	3	332	0	#NULL!	#NULL!
41D	833	3	332	1	#NULL!	#NULL!
41D	834	3	332	1	#NULL!	#NULL!
41D	835	3	332	3	#NULL!	#NULL!
41D	0836A	3	332	0	#NULL!	#NULL!
41D	0836B	3	332	0	#NULL!	#NULL!
41D	837	3	332	1	#NULL!	#NULL!
41D	838	3	332	0	#NULL!	#NULL!
41D	840	3	332	0	#NULL!	#NULL!
41D	841	3	332	0	#NULL!	#NULL!
41D	842	3	332	1	#NULL!	#NULL!
41D	843	3	332	0	#NULL!	#NULL!
41D	844	3	332	2	#NULL!	#NULL!
41D	845	3	332	2	#NULL!	#NULL!
41D	846	3	332	1	#NULL!	#NULL!
41D	847	3	332	1	#NULL!	#NULL!
41D	851	3	332	0	#NULL!	#NULL!
41D	853	3	332	0	#NULL!	#NULL!
41D	854	3	332	3	#NULL!	#NULL!
41D	855	3	332	3	#NULL!	#NULL!
41D	856	3	332	1	#NULL!	#NULL!
41D	857	3	332	2	#NULL!	#NULL!
41D	858	3	332	2	#NULL!	#NULL!
41D	859	3	332	2	#NULL!	#NULL!
41D	860	3	333	1	#NULL!	#NULL!
41D	861	3	332	3	#NULL!	#NULL!
41D	862	3	332	2	#NULL!	#NULL!
41D	863	3	332	0	#NULL!	#NULL!
41D	864	3	332	1	#NULL!	#NULL!
41D	865	3	332	1	#NULL!	#NULL!
41D	866	3	332	0	#NULL!	#NULL!
41D	867	3	332	2	#NULL!	#NULL!
41D	868	3	332	2	#NULL!	#NULL!
41D	869	3	332	0	#NULL!	#NULL!
41D	870	3	332	1	#NULL!	#NULL!
41D	871	3	332	1	#NULL!	#NULL!
41D	872	3	332	0	#NULL!	#NULL!
41D	873	3	332	2	#NULL!	#NULL!
41D	874	3	332	2	#NULL!	#NULL!
41D	875	3	333	0	#NULL!	#NULL!
41D	876	3	332	0	#NULL!	#NULL!
41D	877	3	332	0	#NULL!	#NULL!
41D	878	3	332	3	#NULL!	#NULL!
41D	879	3	332	2	#NULL!	#NULL!
41D	880	3	332	1	#NULL!	#NULL!
41D	881	3	332	0	#NULL!	#NULL!
41D	882	3	332	1	#NULL!	#NULL!
41D	883	3	332	0	#NULL!	#NULL!
41D	884	3	332	2	#NULL!	#NULL!
41D	885	3	333	3	#NULL!	#NULL!
41D	887	3	332	2	#NULL!	#NULL!
41D	888	3	332	1	#NULL!	#NULL!
41D	889	3	332	0	#NULL!	#NULL!
41D	890	3	332	2	#NULL!	#NULL!
41D	891	3	332	0	#NULL!	#NULL!
41D	892	3	332	1	#NULL!	#NULL!
41D	893	3	332	1	#NULL!	#NULL!
41D	894	3	332	1	#NULL!	#NULL!
41D	895	3	332	0	#NULL!	#NULL!
41D	896	3	332	0	#NULL!	#NULL!
41D	897	3	332	2	#NULL!	#NULL!
41D	898	3	332	0	#NULL!	#NULL!
41D	899	3	332	2	#NULL!	#NULL!
41D	900	3	332	3	#NULL!	#NULL!
41D	901	3	332	1	#NULL!	#NULL!
41D	902	3	332	1	#NULL!	#NULL!
41D	903	3	332	1	#NULL!	#NULL!
41D	904	3	332	1	#NULL!	#NULL!
41D	905	3	333	0	#NULL!	#NULL!
41D	906	3	332	0	#NULL!	#NULL!
41D	907	3	332	0	#NULL!	#NULL!
41D	908	3	333	0	#NULL!	#NULL!
41D	909	3	333	0	#NULL!	#NULL!
41D	910	3	332	0	#NULL!	#NULL!
41D	911	3	332	2	#NULL!	#NULL!
41D	912	3	332	0	#NULL!	#NULL!
41D	913	3	332	0	#NULL!	#NULL!
41D	914	3	332	2	#NULL!	#NULL!
41D	915	3	332	2	#NULL!	#NULL!
41D	916	3	332	0	#NULL!	#NULL!
41D	918	3	332	2	#NULL!	#NULL!
41D	919	3	333	0	#NULL!	#NULL!
41D	920	3	332	2	#NULL!	#NULL!
41D	921	3	332	1	#NULL!	#NULL!
41D	922	3	332	0	#NULL!	#NULL!
41D	924	3	332	1	#NULL!	#NULL!
41D	925	3	332	3	#NULL!	#NULL!
41D	929	3	332	2	#NULL!	#NULL!
41D	930	3	332	0	#NULL!	#NULL!
41D	932	3	332	2	#NULL!	#NULL!
41D	933	3	332	0	#NULL!	#NULL!
41D	934	3	332	1	#NULL!	#NULL!
41D	935	3	332	0	#NULL!	#NULL!
41D	936	3	332	0	#NULL!	#NULL!
41D	937	3	332	0	#NULL!	#NULL!
41D	938	3	332	2	#NULL!	#NULL!
41D	939	3	332	0	#NULL!	#NULL!
41D	940	3	332	0	#NULL!	#NULL!
41D	942	3	332	2	#NULL!	#NULL!
41D	943	3	332	0	#NULL!	#NULL!
41D	944	3	332	2	#NULL!	#NULL!
41D	945	3	332	0	#NULL!	#NULL!
41D	946	3	332	0	#NULL!	#NULL!
41D	947	3	332	2	#NULL!	#NULL!
41D	948	3	332	0	#NULL!	#NULL!
41D	949	3	332	0	#NULL!	#NULL!
41D	966	3	332	0	#NULL!	#NULL!
41D	975	3	332	0	#NULL!	#NULL!
41D	976	3	332	3	#NULL!	#NULL!
41D	977	3	332	1	#NULL!	#NULL!
41D	978	3	332	0	#NULL!	#NULL!
41D	979	3	332	0	#NULL!	#NULL!
41D	980	3	332	0	#NULL!	#NULL!
41D	981	3	332	0	#NULL!	#NULL!
41D	982	3	333	3	#NULL!	#NULL!
41D	983	3	332	0	#NULL!	#NULL!
41D	984	3	332	0	#NULL!	#NULL!
41D	986	3	332	2	#NULL!	#NULL!
41D	988	3	332	0	#NULL!	#NULL!
41D	989	3	332	0	#NULL!	#NULL!
41D	990	3	332	0	#NULL!	#NULL!
41D	991	3	332	2	#NULL!	#NULL!
41D	993	3	332	3	#NULL!	#NULL!
41D	994	3	332	3	#NULL!	#NULL!
41D	995	3	332	0	#NULL!	#NULL!
41D	996	3	332	0	#NULL!	#NULL!
41D	997	3	332	0	#NULL!	#NULL!
41D	998	3	332	1	#NULL!	#NULL!
41D	999	3	332	3	#NULL!	#NULL!
41D	1002	3	332	3	#NULL!	#NULL!
41D	1003	3	332	2	#NULL!	#NULL!
41D	1004	3	332	1	#NULL!	#NULL!
41D	1005	3	332	1	#NULL!	#NULL!
41D	1006	3	332	3	#NULL!	#NULL!
41D	1007	3	332	1	#NULL!	#NULL!
41D	1008	3	332	2	#NULL!	#NULL!
41D	1009	3	332	0	#NULL!	#NULL!
41D	1010	3	332	0	#NULL!	#NULL!
41D	1011	3	333	0	#NULL!	#NULL!
41D	1012	3	332	0	#NULL!	#NULL!
41D	1016	3	332	0	#NULL!	#NULL!
41D	1017	3	332	2	#NULL!	#NULL!
41D	1018	3	333	0	#NULL!	#NULL!
41D	1019	3	333	0	#NULL!	#NULL!
41D	1020	3	332	0	#NULL!	#NULL!
41D	1021	3	332	2	#NULL!	#NULL!
41D	1022	3	332	3	#NULL!	#NULL!
41D	1024	3	333	0	#NULL!	#NULL!
41D	1025	3	332	2	#NULL!	#NULL!
41D	1026	3	332	1	#NULL!	#NULL!
41D	1027	3	332	0	#NULL!	#NULL!
41D	1028	3	332	0	#NULL!	#NULL!
41D	1029	3	332	1	#NULL!	#NULL!
41D	1030	3	332	2	#NULL!	#NULL!
41D	1031	3	332	1	#NULL!	#NULL!
41D	1032	3	332	0	#NULL!	#NULL!
41D	1033	3	332	0	#NULL!	#NULL!
41D	1034	3	332	3	#NULL!	#NULL!
41D	1035	3	333	0	#NULL!	#NULL!
41D	1036	3	332	1	#NULL!	#NULL!
41D	1037	3	332	0	#NULL!	#NULL!
41D	1038	3	332	0	#NULL!	#NULL!
41D	1039	3	332	0	#NULL!	#NULL!
41D	1040	3	332	2	#NULL!	#NULL!
41D	1041A	3	333	2	#NULL!	#NULL!
41D	1041B	3	333	0	#NULL!	#NULL!
41D	1042	3	332	2	#NULL!	#NULL!
41D	1043	3	332	0	#NULL!	#NULL!
41D	1044	3	332	3	#NULL!	#NULL!
41D	1045	3	333	3	#NULL!	#NULL!
41D	1046	3	332	2	#NULL!	#NULL!
41D	1049	3	332	2	#NULL!	#NULL!
41D	1050	3	332	1	#NULL!	#NULL!
41D	1051	3	332	2	#NULL!	#NULL!
41D	1052	3	332	0	#NULL!	#NULL!
41D	1053	3	332	1	#NULL!	#NULL!
41D	1054	3	332	0	#NULL!	#NULL!
41D	1055	3	332	0	#NULL!	#NULL!
41D	1056	3	332	0	#NULL!	#NULL!
41D	1058	3	333	0	#NULL!	#NULL!
41D	1059	3	332	0	#NULL!	#NULL!
41D	1062	3	332	3	#NULL!	#NULL!
41D	1063	3	332	2	#NULL!	#NULL!
41D	1064	3	332	0	#NULL!	#NULL!
41D	1065	3	333	2	#NULL!	#NULL!
41D	1066	3	332	2	#NULL!	#NULL!
41D	1069	3	332	1	#NULL!	#NULL!
41D	1070	3	333	3	#NULL!	#NULL!
41D	1071	3	333	0	#NULL!	#NULL!
41D	1072	3	333	3	#NULL!	#NULL!
41D	1073	3	332	1	#NULL!	#NULL!
41D	1074	3	332	2	#NULL!	#NULL!
41D	1075	3	332	0	#NULL!	#NULL!
41D	1076	3	332	2	#NULL!	#NULL!
41D	1077	3	332	1	#NULL!	#NULL!
41D	1079	3	333	2	#NULL!	#NULL!
41D	1080	3	332	1	#NULL!	#NULL!
41D	1081	3	333	1	#NULL!	#NULL!
41D	1082	3	332	1	#NULL!	#NULL!
41D	1083	3	332	0	#NULL!	#NULL!
41D	1085	3	332	0	#NULL!	#NULL!
41D	1086	3	332	2	#NULL!	#NULL!
41D	1087	3	333	0	#NULL!	#NULL!
41D	1088	3	332	1	#NULL!	#NULL!
41D	1089	3	332	0	#NULL!	#NULL!
41D	1090	3	332	2	#NULL!	#NULL!
41D	1091	3	332	0	#NULL!	#NULL!
41D	1092	3	332	0	#NULL!	#NULL!
41D	1093	3	332	0	#NULL!	#NULL!
41D	1094	3	332	2	#NULL!	#NULL!
41D	1095	3	332	0	#NULL!	#NULL!
41D	1096	3	333	0	#NULL!	#NULL!
41D	1098	3	332	0	#NULL!	#NULL!
41D	1100	3	332	0	#NULL!	#NULL!
41D	1101	3	333	0	#NULL!	#NULL!
41D	1102	3	332	1	#NULL!	#NULL!
41D	1103	3	332	1	#NULL!	#NULL!
41D	1104	3	332	0	#NULL!	#NULL!
41D	1105	3	332	1	#NULL!	#NULL!
41D	1106	3	332	2	#NULL!	#NULL!
41D	1107	3	332	0	#NULL!	#NULL!
41D	1108	3	332	3	#NULL!	#NULL!
41D	1109	3	332	1	#NULL!	#NULL!
41D	1110	3	332	2	#NULL!	#NULL!
41D	1111	3	332	0	#NULL!	#NULL!
41D	1112	3	332	1	#NULL!	#NULL!
41D	1114	3	332	2	#NULL!	#NULL!
41D	1115	3	332	1	#NULL!	#NULL!
41D	1116	3	332	0	#NULL!	#NULL!
41D	1117	3	332	0	#NULL!	#NULL!
41D	1118	3	332	0	#NULL!	#NULL!
41D	1119	3	332	2	#NULL!	#NULL!
41D	1120	3	332	2	#NULL!	#NULL!
41D	1121	3	332	0	#NULL!	#NULL!
41D	1122	3	332	2	#NULL!	#NULL!
41D	1123	3	332	0	#NULL!	#NULL!
41D	1124	3	332	0	#NULL!	#NULL!
41D	1125	3	332	1	#NULL!	#NULL!
41D	1126	3	332	2	#NULL!	#NULL!
41D	1127	3	332	0	#NULL!	#NULL!
41D	1129	3	332	0	#NULL!	#NULL!
41D	1130	3	332	0	#NULL!	#NULL!
41D	1131	3	332	0	#NULL!	#NULL!
41D	1132	3	332	2	#NULL!	#NULL!
41D	1133	3	332	1	#NULL!	#NULL!
41D	1134	3	333	2	#NULL!	#NULL!
41D	1135	3	332	0	#NULL!	#NULL!
41D	1136	3	332	2	#NULL!	#NULL!
41D	1137	3	332	0	#NULL!	#NULL!
41D	1138	3	332	1	#NULL!	#NULL!
41D	1139	3	332	1	#NULL!	#NULL!
41D	1140	3	332	0	#NULL!	#NULL!
41D	1141	3	332	0	#NULL!	#NULL!
41D	1142	3	332	3	#NULL!	#NULL!
41D	1143	3	332	0	#NULL!	#NULL!
41D	1144	3	332	1	#NULL!	#NULL!
41D	1147	3	332	2	#NULL!	#NULL!
41D	1148	3	332	3	#NULL!	#NULL!
41D	1149	3	332	0	#NULL!	#NULL!
41D	1150	3	332	2	#NULL!	#NULL!
41D	1151	3	332	2	#NULL!	#NULL!
41D	1152	3	332	0	#NULL!	#NULL!
41D	1153	3	332	0	#NULL!	#NULL!
41D	1154	3	332	1	#NULL!	#NULL!
41D	1155	3	332	0	#NULL!	#NULL!
41D	1156	3	333	0	#NULL!	#NULL!
41D	1157	3	332	1	#NULL!	#NULL!
41D	1158	3	332	0	#NULL!	#NULL!
41D	1159	3	332	0	#NULL!	#NULL!
41D	1160	3	332	2	#NULL!	#NULL!
41D	1161	3	332	1	#NULL!	#NULL!
41D	1162	3	332	2	#NULL!	#NULL!
41D	1163	3	332	1	#NULL!	#NULL!
41D	1164	3	332	1	#NULL!	#NULL!
41D	1165	3	332	2	#NULL!	#NULL!
41D	1166	3	332	0	#NULL!	#NULL!
41D	1167	3	332	2	#NULL!	#NULL!
41D	1168	3	332	0	#NULL!	#NULL!
41D	1169	3	332	0	#NULL!	#NULL!
41D	1170	3	332	3	#NULL!	#NULL!
41D	1171	3	332	1	#NULL!	#NULL!
41D	1172	3	332	1	#NULL!	#NULL!
41D	1173	3	332	3	#NULL!	#NULL!
41D	1174	3	332	1	#NULL!	#NULL!
41D	1175	3	332	0	#NULL!	#NULL!
41D	1176	3	332	1	#NULL!	#NULL!
41D	1177	3	332	0	#NULL!	#NULL!
41D	1178	3	332	0	#NULL!	#NULL!
41D	1179	3	332	2	#NULL!	#NULL!
41D	1180	3	332	1	#NULL!	#NULL!
41D	1181	3	332	1	#NULL!	#NULL!
41D	1182	3	332	1	#NULL!	#NULL!
41D	1183	3	332	0	#NULL!	#NULL!
41D	1184	3	332	3	#NULL!	#NULL!
41D	1185	3	332	2	#NULL!	#NULL!
41D	1187	3	332	1	#NULL!	#NULL!
41D	1188	3	332	2	#NULL!	#NULL!
41D	1189	3	332	0	#NULL!	#NULL!
41D	1190	3	332	3	#NULL!	#NULL!
41D	1191	3	332	0	#NULL!	#NULL!
41D	1192	3	332	0	#NULL!	#NULL!
41D	1193	3	332	0	#NULL!	#NULL!
41D	1194	3	332	1	#NULL!	#NULL!
41D	1195	3	332	0	#NULL!	#NULL!
41D	1196	3	332	0	#NULL!	#NULL!
41D	1197	3	332	1	#NULL!	#NULL!
41D	1198	3	332	3	#NULL!	#NULL!
41D	1199	3	332	3	#NULL!	#NULL!
41D	1200	3	332	0	#NULL!	#NULL!
41D	1201	3	332	0	#NULL!	#NULL!
41D	1202	3	332	0	#NULL!	#NULL!
41D	1203	3	332	3	#NULL!	#NULL!
41D	1204	3	332	0	#NULL!	#NULL!
41D	1205	3	332	0	#NULL!	#NULL!
41D	1206	3	332	1	#NULL!	#NULL!
41D	1207	3	332	2	#NULL!	#NULL!
41D	1208	3	332	0	#NULL!	#NULL!
41D	1210	3	332	0	#NULL!	#NULL!
41D	1211	3	332	3	#NULL!	#NULL!
41D	1212	3	332	2	#NULL!	#NULL!
41D	1213	3	332	3	#NULL!	#NULL!
41D	1214	3	332	0	#NULL!	#NULL!
41D	1215	3	332	1	#NULL!	#NULL!
41D	1216	3	332	0	#NULL!	#NULL!
41D	1217	3	332	3	#NULL!	#NULL!
41D	1218	3	332	1	#NULL!	#NULL!
41D	1219	3	332	0	#NULL!	#NULL!
41D	1220	3	332	2	#NULL!	#NULL!
41D	1221	3	332	2	#NULL!	#NULL!
41D	1222	3	332	2	#NULL!	#NULL!
41D	1223	3	332	0	#NULL!	#NULL!
41D	1224	3	332	1	#NULL!	#NULL!
41D	1225	3	332	1	#NULL!	#NULL!
41D	1226	3	332	0	#NULL!	#NULL!
41D	1227	3	332	1	#NULL!	#NULL!
41D	1228	3	332	0	#NULL!	#NULL!
41D	1229	3	332	3	#NULL!	#NULL!
41D	1230	3	332	0	#NULL!	#NULL!
41D	1231	3	332	3	#NULL!	#NULL!
41D	1232	3	332	3	#NULL!	#NULL!
41D	1233	3	332	1	#NULL!	#NULL!
41D	1234	3	332	1	#NULL!	#NULL!
41D	1235	3	332	2	#NULL!	#NULL!
41D	1236	3	332	2	#NULL!	#NULL!
41D	1237	3	332	0	#NULL!	#NULL!
41D	1238	3	332	1	#NULL!	#NULL!
41D	1239	3	332	0	#NULL!	#NULL!
41D	1240	3	332	0	#NULL!	#NULL!
41D	1241	3	332	0	#NULL!	#NULL!
41D	1242	3	332	0	#NULL!	#NULL!
41D	1243	3	332	0	#NULL!	#NULL!
41D	1244	3	332	3	#NULL!	#NULL!
41D	1245	3	332	3	#NULL!	#NULL!
41D	1246	3	332	3	#NULL!	#NULL!
41D	1247	3	332	2	#NULL!	#NULL!
41D	1248	3	332	0	#NULL!	#NULL!
41D	1249	3	332	0	#NULL!	#NULL!
41D	1251	3	332	2	#NULL!	#NULL!
41D	1252	3	332	1	#NULL!	#NULL!
41D	1253	3	332	0	#NULL!	#NULL!
41D	1254	3	332	0	#NULL!	#NULL!
41D	1255	3	332	0	#NULL!	#NULL!
41D	1256	3	332	0	#NULL!	#NULL!
41D	1257	3	332	0	#NULL!	#NULL!
41D	1258	3	332	3	#NULL!	#NULL!
41D	1259	3	332	0	#NULL!	#NULL!
41D	1260	3	332	0	#NULL!	#NULL!
41D	1262	3	332	1	#NULL!	#NULL!
41D	1263	3	332	0	#NULL!	#NULL!
41D	1264	3	332	2	#NULL!	#NULL!
41D	1265	3	332	0	#NULL!	#NULL!
41D	1266	3	332	0	#NULL!	#NULL!
41D	1267	3	332	3	#NULL!	#NULL!
41D	1268	3	332	2	#NULL!	#NULL!
41D	1269	3	332	1	#NULL!	#NULL!
41D	1270	3	332	0	#NULL!	#NULL!
41D	1271	3	332	2	#NULL!	#NULL!
41D	1272	3	332	1	#NULL!	#NULL!
41D	1273	3	332	1	#NULL!	#NULL!
41D	1274	3	332	0	#NULL!	#NULL!
41D	1275	3	332	0	#NULL!	#NULL!
41D	1276	3	332	0	#NULL!	#NULL!
41D	1277	3	332	0	#NULL!	#NULL!
41D	1278	3	332	0	#NULL!	#NULL!
41D	1279	3	332	3	#NULL!	#NULL!
41D	1280	3	332	2	#NULL!	#NULL!
41D	1281	3	332	0	#NULL!	#NULL!
41D	1282	3	332	0	#NULL!	#NULL!
41D	1283	3	332	0	#NULL!	#NULL!
41D	1284	3	332	0	#NULL!	#NULL!
41D	1285	3	332	0	#NULL!	#NULL!
41D	1286	3	332	0	#NULL!	#NULL!
41D	1287	3	332	3	#NULL!	#NULL!
41D	1288	3	332	0	#NULL!	#NULL!
41D	1290	3	332	0	#NULL!	#NULL!
41D	1291	3	332	2	#NULL!	#NULL!
41D	1292	3	332	3	#NULL!	#NULL!
41D	1293	3	332	2	#NULL!	#NULL!
41D	1294	3	332	0	#NULL!	#NULL!
41D	1295	3	332	0	#NULL!	#NULL!
41D	1296	3	332	0	#NULL!	#NULL!
41D	1297	3	332	3	#NULL!	#NULL!
41D	1298	3	332	3	#NULL!	#NULL!
41D	1299	3	332	1	#NULL!	#NULL!
41D	1300	3	332	0	#NULL!	#NULL!
41D	1301	3	332	1	#NULL!	#NULL!
41D	1302	3	332	0	#NULL!	#NULL!
41D	1303	3	332	1	#NULL!	#NULL!
41D	1304	3	332	1	#NULL!	#NULL!
41D	1305	3	332	3	#NULL!	#NULL!
41D	1306	3	332	0	#NULL!	#NULL!
41D	1307	3	332	3	#NULL!	#NULL!
41D	1308	3	332	3	#NULL!	#NULL!
41D	1309	3	332	2	#NULL!	#NULL!
41D	1310	3	332	3	#NULL!	#NULL!
41D	1311	3	332	0	#NULL!	#NULL!
41D	1312	3	332	0	#NULL!	#NULL!
41D	1313	3	332	0	#NULL!	#NULL!
41D	1314	3	332	0	#NULL!	#NULL!
41D	1315	3	332	0	#NULL!	#NULL!
41D	1316	3	332	3	#NULL!	#NULL!
41D	1317	3	332	0	#NULL!	#NULL!
41D	1318	3	332	3	#NULL!	#NULL!
41D	1319	3	332	2	#NULL!	#NULL!
41D	1320	3	332	0	#NULL!	#NULL!
41D	1321	3	332	1	#NULL!	#NULL!
41D	1322	3	332	0	#NULL!	#NULL!
41D	1323	3	332	0	#NULL!	#NULL!
41D	1324	3	332	1	#NULL!	#NULL!
41D	1325	3	332	3	#NULL!	#NULL!
41D	1326	3	332	0	#NULL!	#NULL!
41D	1327	3	332	0	#NULL!	#NULL!
41D	1328	3	332	1	#NULL!	#NULL!
41D	1329	3	332	3	#NULL!	#NULL!
41D	1330	3	332	2	#NULL!	#NULL!
41D	1331	3	332	0	#NULL!	#NULL!
41D	1332	3	332	0	#NULL!	#NULL!
41D	1333	3	332	0	#NULL!	#NULL!
41D	1334	3	332	0	#NULL!	#NULL!
41D	1335	3	332	0	#NULL!	#NULL!
41D	1336	3	332	0	#NULL!	#NULL!
41D	1337	3	332	0	#NULL!	#NULL!
41D	1338	3	332	0	#NULL!	#NULL!
41D	1339	3	332	0	#NULL!	#NULL!
41D	1340	3	332	0	#NULL!	#NULL!
41D	1341	3	332	0	#NULL!	#NULL!
41D	1342	3	332	2	#NULL!	#NULL!
41D	1344	3	332	0	#NULL!	#NULL!
41D	1345	3	332	0	#NULL!	#NULL!
41D	1346	3	332	0	#NULL!	#NULL!
41D	1347	3	332	1	#NULL!	#NULL!
41D	1348	3	332	0	#NULL!	#NULL!
41D	1349	3	332	2	#NULL!	#NULL!
41D	1350	3	332	0	#NULL!	#NULL!
41D	1351	3	332	0	#NULL!	#NULL!
41D	1352	3	332	2	#NULL!	#NULL!
41D	1353	3	332	0	#NULL!	#NULL!
41D	1354	3	332	0	#NULL!	#NULL!
41D	1355	3	332	0	#NULL!	#NULL!
41D	1356	3	332	0	#NULL!	#NULL!
41D	1357	3	332	0	#NULL!	#NULL!
41D	1358	3	332	0	#NULL!	#NULL!
41D	1359	3	332	0	#NULL!	#NULL!
41D	1360	3	332	1	#NULL!	#NULL!
41D	1361	3	332	2	#NULL!	#NULL!
41D	1363	3	332	0	#NULL!	#NULL!
41D	1364	3	332	1	#NULL!	#NULL!
41D	1365	3	332	0	#NULL!	#NULL!
41D	1366	3	332	3	#NULL!	#NULL!
41D	1367	3	332	3	#NULL!	#NULL!
41D	1369	3	332	0	#NULL!	#NULL!
41D	1370	3	332	0	#NULL!	#NULL!
41D	1371	3	332	0	#NULL!	#NULL!
41D	1372	3	332	0	#NULL!	#NULL!
41D	1373	3	332	0	#NULL!	#NULL!
41D	1374	3	332	0	#NULL!	#NULL!
41D	1375	3	332	3	#NULL!	#NULL!
41D	1376	3	332	1	#NULL!	#NULL!
41D	1378	3	332	2	#NULL!	#NULL!
41D	1380	3	332	0	#NULL!	#NULL!
41D	1381	3	332	0	#NULL!	#NULL!
41D	1382	3	332	0	#NULL!	#NULL!
41D	1385	3	332	0	#NULL!	#NULL!
41D	1386	3	332	0	#NULL!	#NULL!
41D	1391	3	332	0	#NULL!	#NULL!
41D	1392	3	332	0	#NULL!	#NULL!
41D	1393	3	332	0	#NULL!	#NULL!
41D	1394	3	332	0	#NULL!	#NULL!
41D	1395	3	332	0	#NULL!	#NULL!
41D	1397	3	332	3	#NULL!	#NULL!
41D	1398	3	332	0	#NULL!	#NULL!
41D	1399	3	332	3	#NULL!	#NULL!
41D	1400	3	332	0	#NULL!	#NULL!
41D	1401	3	332	2	#NULL!	#NULL!
41D	1403	3	332	0	#NULL!	#NULL!
41D	1404	3	332	3	#NULL!	#NULL!
41D	1405	3	332	3	#NULL!	#NULL!
41D	1406	3	332	0	#NULL!	#NULL!
41D	1407	3	332	1	#NULL!	#NULL!
41D	1408	3	332	0	#NULL!	#NULL!
41D	1409	3	332	0	#NULL!	#NULL!
41D	1410	3	332	0	#NULL!	#NULL!
41D	1411	3	332	0	#NULL!	#NULL!
41D	1412	3	332	3	#NULL!	#NULL!
41D	1414	3	332	0	#NULL!	#NULL!
41D	1415	3	332	0	#NULL!	#NULL!
41D	1416	3	332	0	#NULL!	#NULL!
41D	1417	3	332	0	#NULL!	#NULL!
41D	1418	3	332	0	#NULL!	#NULL!
41D	1419	3	332	0	#NULL!	#NULL!
41D	1420	3	332	3	#NULL!	#NULL!
41D	1421	3	332	0	#NULL!	#NULL!
41D	1422	3	332	3	#NULL!	#NULL!
41D	1425	3	332	0	#NULL!	#NULL!
41D	1426	3	332	0	#NULL!	#NULL!
41D	1427	3	332	0	#NULL!	#NULL!
41D	1428	3	332	0	#NULL!	#NULL!
41D	1429	3	332	0	#NULL!	#NULL!
41D	1430	3	332	0	#NULL!	#NULL!
41D	1431	3	332	0	#NULL!	#NULL!
41D	1432	3	332	1	#NULL!	#NULL!
41D	1433	3	332	3	#NULL!	#NULL!
41D	1434	3	332	3	#NULL!	#NULL!
41D	1435	3	332	0	#NULL!	#NULL!
41D	1436	3	332	0	#NULL!	#NULL!
41D	1438	3	332	0	#NULL!	#NULL!
41D	1439	3	332	0	#NULL!	#NULL!
41D	1440	3	332	0	#NULL!	#NULL!
41D	1441	3	332	0	#NULL!	#NULL!
41D	1443	3	333	0	#NULL!	#NULL!
41D	1445	3	332	0	#NULL!	#NULL!
41D	1446	3	332	3	#NULL!	#NULL!
41D	1447	3	332	1	#NULL!	#NULL!
41D	1448	3	332	0	#NULL!	#NULL!
41D	1449	3	332	2	#NULL!	#NULL!
41D	1450	3	333	2	#NULL!	#NULL!
41D	1451	3	332	2	#NULL!	#NULL!
41D	1452	3	332	0	#NULL!	#NULL!
41D	1453	3	332	0	#NULL!	#NULL!
41D	1454	3	332	3	#NULL!	#NULL!
41D	1455	3	332	0	#NULL!	#NULL!
41D	1456	3	332	0	#NULL!	#NULL!
41D	1457	3	332	0	#NULL!	#NULL!
41D	1458	3	332	2	#NULL!	#NULL!
41D	1459	3	332	0	#NULL!	#NULL!
41D	1460	3	332	3	#NULL!	#NULL!
41D	1461	3	333	3	#NULL!	#NULL!
41D	1462	3	332	2	#NULL!	#NULL!
41D	1463	3	332	1	#NULL!	#NULL!
41D	1464	3	332	0	#NULL!	#NULL!
41D	1465	3	332	3	#NULL!	#NULL!
41D	1466	3	332	0	#NULL!	#NULL!
41D	1467	3	332	0	#NULL!	#NULL!
41D	1468	3	332	2	#NULL!	#NULL!
41D	1469	3	332	0	#NULL!	#NULL!
41D	1470	3	332	3	#NULL!	#NULL!
41D	1471	3	332	1	#NULL!	#NULL!
41D	1472	3	332	0	#NULL!	#NULL!
41D	1474	3	332	3	#NULL!	#NULL!
41D	1475	3	332	0	#NULL!	#NULL!
41D	1476	3	332	1	#NULL!	#NULL!
41D	1477	3	332	0	#NULL!	#NULL!
41D	1478	3	332	2	#NULL!	#NULL!
41D	1479	3	332	1	#NULL!	#NULL!
41D	1480	3	332	0	#NULL!	#NULL!
41D	1481	3	332	0	#NULL!	#NULL!
41D	1482	3	332	0	#NULL!	#NULL!
41D	1483	3	332	1	#NULL!	#NULL!
41D	1484	3	332	0	#NULL!	#NULL!
41D	1485	3	332	0	#NULL!	#NULL!
41D	1486	3	332	0	#NULL!	#NULL!
41D	1487	3	332	3	#NULL!	#NULL!
41D	1488	3	332	3	#NULL!	#NULL!
41D	1489	3	332	0	#NULL!	#NULL!
41D	1490	3	332	0	#NULL!	#NULL!
41D	1491	3	332	0	#NULL!	#NULL!
41D	1492	3	332	0	#NULL!	#NULL!
41D	1493	3	332	0	#NULL!	#NULL!
41D	1494	3	332	2	#NULL!	#NULL!
41D	1495	3	332	3	#NULL!	#NULL!
41D	1496	3	332	0	#NULL!	#NULL!
41D	1498	3	332	2	#NULL!	#NULL!
41D	1499	3	332	1	#NULL!	#NULL!
41D	1500	3	332	3	#NULL!	#NULL!
41D	1501	3	332	2	#NULL!	#NULL!
41D	1502	3	332	3	#NULL!	#NULL!
41D	1504	3	332	0	#NULL!	#NULL!
41D	1506	3	332	0	#NULL!	#NULL!
41D	1507	3	332	0	#NULL!	#NULL!
41D	1508	3	332	0	#NULL!	#NULL!
41D	1509	3	333	0	#NULL!	#NULL!
41D	1510	3	332	1	#NULL!	#NULL!
41D	1511	3	332	0	#NULL!	#NULL!
41D	1512	3	332	1	#NULL!	#NULL!
41D	1513	3	332	3	#NULL!	#NULL!
ftl	83	2	333	1	#NULL!	#NULL!
ftl	8510	2	333	1	#NULL!	#NULL!
ftl	852	2	333	1	#NULL!	#NULL!
ftl	859	2	333	1	#NULL!	#NULL!
ftl	851	2	333	1	#NULL!	#NULL!
ftl	880	2	333	1	#NULL!	#NULL!
ftl	855	2	333	1	#NULL!	#NULL!
ftl	0085N	2	333	1	#NULL!	#NULL!
ftl	8512	2	333	1	#NULL!	#NULL!
ftl	0085S	2	333	1	#NULL!	#NULL!
ftl	0084R	2	333	0	#NULL!	#NULL!
ftl	857	2	333	1	#NULL!	#NULL!
ftl	8511	2	333	1	#NULL!	#NULL!
ftl	858	2	333	1	#NULL!	#NULL!
ftl	856	2	333	1	#NULL!	#NULL!
ftl	0084L	2	333	1	#NULL!	#NULL!
ftl	810	2	333	0	#NULL!	#NULL!
ftl	853	2	333	1	#NULL!	#NULL!
ftl	854	2	333	0	#NULL!	#NULL!
SNK	100	2	333	1	#NULL!	#NULL!
SNK	200	2	333	1	#NULL!	#NULL!
SNK	300	2	333	1	#NULL!	#NULL!
SNK	400	2	333	1	#NULL!	#NULL!
SNK	501	2	333	2	#NULL!	#NULL!
SNK	600	2	333	0	#NULL!	#NULL!
SNK	700	2	333	1	#NULL!	#NULL!
SNK	800	2	333	0	#NULL!	#NULL!
SNK	1000	2	333	1	#NULL!	#NULL!
SNK	1100	2	333	1	#NULL!	#NULL!
SNK	1200	2	333	1	#NULL!	#NULL!
SNK	1300	2	333	1	#NULL!	#NULL!
SNK	1400	2	333	0	#NULL!	#NULL!
SNK	1500	2	333	1	#NULL!	#NULL!
SNK	1600	2	333	1	#NULL!	#NULL!
SNK	1701	2	333	1	#NULL!	#NULL!
SNK	1800	2	333	1	#NULL!	#NULL!
SNK	1900	2	333	1	#NULL!	#NULL!
SNK	2000	2	333	1	#NULL!	#NULL!
SNK	2100	2	333	1	#NULL!	#NULL!
SNK	2300	2	333	1	#NULL!	#NULL!
SNK	2400	2	333	1	#NULL!	#NULL!
SNK	2600	2	333	0	#NULL!	#NULL!
SNK	2700	2	333	0	#NULL!	#NULL!
SNK	2800	2	333	0	#NULL!	#NULL!
GPS	002A0	2	333	1	#NULL!	#NULL!
GPS	001A0	2	333	1	#NULL!	#NULL!
GPS	002B0	2	333	2	#NULL!	#NULL!
GPS	002C0	2	333	1	#NULL!	#NULL!
GPS	002D0	2	333	3	#NULL!	#NULL!
GPS	2	2	333	2	#NULL!	#NULL!
GPS	002G0	2	333	2	#NULL!	#NULL!
GPS	002H0	2	333	2	#NULL!	#NULL!
GPS	002I0	2	333	3	#NULL!	#NULL!
GPS	002J0	2	333	1	#NULL!	#NULL!
GPS	002K0	2	333	3	#NULL!	#NULL!
GPS	002L0	2	333	1	#NULL!	#NULL!
GPS	002M0	2	333	1	#NULL!	#NULL!
GPS	002N0	2	333	1	#NULL!	#NULL!
GPS	002O0	2	333	1	#NULL!	#NULL!
GPS	002P0	2	333	3	#NULL!	#NULL!
GPS	002Q0	2	333	3	#NULL!	#NULL!
GPS	002R0	2	333	3	#NULL!	#NULL!
GPS	002S0	2	333	2	#NULL!	#NULL!
GPS	002T0	2	333	1	#NULL!	#NULL!
GPS	002U0	2	333	1	#NULL!	#NULL!
GPS	002V0	2	333	3	#NULL!	#NULL!
GPS	002X0	2	333	1	#NULL!	#NULL!
GPS	002Y0	2	333	2	#NULL!	#NULL!
GPS	002Z0	2	333	1	#NULL!	#NULL!
GPS	002AA	2	333	1	#NULL!	#NULL!
GPS	002BB	2	333	2	#NULL!	#NULL!
GPS	002CC	2	333	1	#NULL!	#NULL!
GPS	002DD	2	333	1	#NULL!	#NULL!
GPS	002EE	2	333	2	#NULL!	#NULL!
stt	B002-	2	.	1	#NULL!	#NULL!
stt	B003A	2	.	#NULL!	#NULL!	#NULL!
stt	B019-	2	.	2	#NULL!	#NULL!
stt	B032-	2	.	1	#NULL!	#NULL!
stt	B037-	2	.	1	#NULL!	#NULL!
stt	B234-	2	.	2	#NULL!	#NULL!
stt	B001-	2	.	0	#NULL!	#NULL!
stt	B009-	2	.	#NULL!	#NULL!	#NULL!
stt	B011-	2	.	1	#NULL!	#NULL!
stt	B012-	2	.	1	#NULL!	#NULL!
stt	B015-	2	.	#NULL!	#NULL!	#NULL!
stt	B018-	2	.	3	#NULL!	#NULL!
stt	B021-	2	.	1	#NULL!	#NULL!
stt	B025-	2	.	0	#NULL!	#NULL!
stt	B026-	2	.	0	#NULL!	#NULL!
stt	B028-	2	.	1	#NULL!	#NULL!
stt	B029-	2	.	0	#NULL!	#NULL!
stt	B030-	2	.	2	#NULL!	#NULL!
stt	B031-	2	.	1	#NULL!	#NULL!
stt	B035-	2	.	1	#NULL!	#NULL!
stt	B036-	2	.	3	#NULL!	#NULL!
stt	B039-	2	.	0	#NULL!	#NULL!
stt	B040-	2	.	0	#NULL!	#NULL!
stt	B042-	2	.	2	#NULL!	#NULL!
stt	B043-	2	.	1	#NULL!	#NULL!
stt	B045-	2	.	2	#NULL!	#NULL!
stt	B047-	2	.	3	#NULL!	#NULL!
stt	B048-	2	.	1	#NULL!	#NULL!
stt	B049-	2	.	0	#NULL!	#NULL!
stt	B050-	2	.	#NULL!	#NULL!	#NULL!
stt	B051-	2	.	#NULL!	#NULL!	#NULL!
stt	B054-	2	.	0	#NULL!	#NULL!
stt	B056-	2	.	2	#NULL!	#NULL!
stt	B058-	2	.	0	#NULL!	#NULL!
stt	B059-	2	.	0	#NULL!	#NULL!
stt	B061-	2	.	0	#NULL!	#NULL!
stt	B067-	2	.	1	#NULL!	#NULL!
stt	B068-	2	.	0	#NULL!	#NULL!
stt	B071-	2	.	1	#NULL!	#NULL!
stt	B074-	2	.	2	#NULL!	#NULL!
stt	B076-	2	.	1	#NULL!	#NULL!
stt	B077-	2	.	1	#NULL!	#NULL!
stt	B078-	2	.	#NULL!	#NULL!	#NULL!
stt	B086-	2	.	1	#NULL!	#NULL!
stt	B087-	2	.	1	#NULL!	#NULL!
stt	B089-	2	.	2	#NULL!	#NULL!
stt	B092A	2	.	1	#NULL!	#NULL!
stt	B095-	2	.	#NULL!	#NULL!	#NULL!
stt	B096-	2	.	0	#NULL!	#NULL!
stt	B097-	2	.	0	#NULL!	#NULL!
stt	B098-	2	.	1	#NULL!	#NULL!
stt	B099-	2	.	#NULL!	#NULL!	#NULL!
stt	B100-	2	.	0	#NULL!	#NULL!
stt	B101-	2	.	3	#NULL!	#NULL!
stt	B102A	2	.	1	#NULL!	#NULL!
stt	B103-	2	.	3	#NULL!	#NULL!
stt	B108-	2	.	0	#NULL!	#NULL!
stt	B111-	2	.	1	#NULL!	#NULL!
stt	B112-	2	.	3	#NULL!	#NULL!
stt	B114-	2	.	3	#NULL!	#NULL!
stt	B115-	2	.	1	#NULL!	#NULL!
stt	B117-	2	.	3	#NULL!	#NULL!
stt	B121-	2	.	3	#NULL!	#NULL!
stt	B122-	2	.	0	#NULL!	#NULL!
stt	B124-	2	.	0	#NULL!	#NULL!
stt	B128-	2	.	1	#NULL!	#NULL!
stt	B130-	2	.	1	#NULL!	#NULL!
stt	B131A	2	.	2	#NULL!	#NULL!
stt	B131-	2	.	1	#NULL!	#NULL!
stt	B132-	2	.	2	#NULL!	#NULL!
stt	B133-	2	.	1	#NULL!	#NULL!
stt	B135-	2	.	1	#NULL!	#NULL!
stt	B136-	2	.	0	#NULL!	#NULL!
stt	B137-	2	.	2	#NULL!	#NULL!
stt	B138-	2	.	2	#NULL!	#NULL!
stt	B139-	2	.	0	#NULL!	#NULL!
stt	B150-	2	.	0	#NULL!	#NULL!
stt	B151-	2	.	#NULL!	#NULL!	#NULL!
stt	B156-	2	.	0	#NULL!	#NULL!
stt	B157-	2	.	2	#NULL!	#NULL!
stt	B159-	2	.	3	#NULL!	#NULL!
stt	B161-	2	.	1	#NULL!	#NULL!
stt	B165-	2	.	1	#NULL!	#NULL!
stt	B167-	2	.	1	#NULL!	#NULL!
stt	B168-	2	.	0	#NULL!	#NULL!
stt	B168A	2	.	1	#NULL!	#NULL!
stt	B169-	2	.	2	#NULL!	#NULL!
stt	B170-	2	.	3	#NULL!	#NULL!
stt	B171-	2	.	1	#NULL!	#NULL!
stt	B172-	2	.	2	#NULL!	#NULL!
stt	B176-	2	.	3	#NULL!	#NULL!
stt	B178-	2	.	0	#NULL!	#NULL!
stt	B179-	2	.	3	#NULL!	#NULL!
stt	B181-	2	.	3	#NULL!	#NULL!
stt	B182-	2	.	1	#NULL!	#NULL!
stt	B183-	2	.	2	#NULL!	#NULL!
stt	B188-	2	.	1	#NULL!	#NULL!
stt	B191-	2	.	2	#NULL!	#NULL!
stt	B192-	2	.	1	#NULL!	#NULL!
stt	B193-	2	.	0	#NULL!	#NULL!
stt	B194-	2	.	#NULL!	#NULL!	#NULL!
stt	B196-	2	.	1	#NULL!	#NULL!
stt	B199-	2	.	#NULL!	#NULL!	#NULL!
stt	B204-	2	.	1	#NULL!	#NULL!
stt	B206-	2	.	#NULL!	#NULL!	#NULL!
stt	B209-	2	.	#NULL!	#NULL!	#NULL!
stt	B210A	2	.	1	#NULL!	#NULL!
stt	B210-	2	.	1	#NULL!	#NULL!
stt	B211A	2	.	0	#NULL!	#NULL!
stt	B222-	2	.	0	#NULL!	#NULL!
stt	B226-	2	.	1	#NULL!	#NULL!
stt	B227-	2	.	#NULL!	#NULL!	#NULL!
stt	B228-	2	.	0	#NULL!	#NULL!
stt	B229-	2	.	2	#NULL!	#NULL!
stt	B231-	2	.	2	#NULL!	#NULL!
stt	B242-	2	.	3	#NULL!	#NULL!
stt	B243-	2	.	0	#NULL!	#NULL!
stt	B245-	2	.	1	#NULL!	#NULL!
stt	B246-	2	.	1	#NULL!	#NULL!
stt	B248-	2	.	0	#NULL!	#NULL!
stt	B249-	2	.	0	#NULL!	#NULL!
stt	B250-	2	.	2	#NULL!	#NULL!
stt	B251-	2	.	1	#NULL!	#NULL!
stt	B260-	2	.	1	#NULL!	#NULL!
stt	B262-	2	.	1	#NULL!	#NULL!
stt	B263-	2	.	3	#NULL!	#NULL!
stt	B268-	2	.	1	#NULL!	#NULL!
stt	B269A	2	.	1	#NULL!	#NULL!
stt	B272-	2	.	1	#NULL!	#NULL!
stt	B274-	2	.	0	#NULL!	#NULL!
stt	B277-	2	.	1	#NULL!	#NULL!
stt	B281-	2	.	2	#NULL!	#NULL!
stt	B282-	2	.	#NULL!	#NULL!	#NULL!
stt	B283-	2	.	#NULL!	#NULL!	#NULL!
stt	B287-	2	.	1	#NULL!	#NULL!
stt	B292-	2	.	#NULL!	#NULL!	#NULL!
stt	B294-	2	.	#NULL!	#NULL!	#NULL!
stt	B295-	2	.	#NULL!	#NULL!	#NULL!
stt	B297-	2	.	1	#NULL!	#NULL!
stt	B298-	2	.	1	#NULL!	#NULL!
stt	B300-	2	.	1	#NULL!	#NULL!
stt	B301-	2	.	3	#NULL!	#NULL!
stt	B302-	2	.	3	#NULL!	#NULL!
stt	B303-	2	.	0	#NULL!	#NULL!
stt	B304-	2	.	0	#NULL!	#NULL!
stt	B305-	2	.	1	#NULL!	#NULL!
stt	B307-	2	.	3	#NULL!	#NULL!
stt	B308-	2	.	#NULL!	#NULL!	#NULL!
stt	B309-	2	.	1	#NULL!	#NULL!
stt	B310-	2	.	1	#NULL!	#NULL!
stt	B311-	2	.	3	#NULL!	#NULL!
stt	B312-	2	.	1	#NULL!	#NULL!
stt	B313-	2	.	1	#NULL!	#NULL!
stt	B314-	2	.	0	#NULL!	#NULL!
stt	B315-	2	.	0	#NULL!	#NULL!
stt	B316-	2	.	1	#NULL!	#NULL!
stt	B317-	2	.	1	#NULL!	#NULL!
stt	B330-	2	.	2	#NULL!	#NULL!
stt	B333A	2	.	2	#NULL!	#NULL!
stt	B334-	2	.	3	#NULL!	#NULL!
stt	B335-	2	.	1	#NULL!	#NULL!
stt	B336-	2	.	0	#NULL!	#NULL!
stt	B339-	2	.	0	#NULL!	#NULL!
stt	B341-	2	.	1	#NULL!	#NULL!
stt	B342-	2	.	1	#NULL!	#NULL!
stt	B343-	2	.	1	#NULL!	#NULL!
stt	B345-	2	.	1	#NULL!	#NULL!
stt	B351-	2	.	1	#NULL!	#NULL!
stt	B351A	2	.	1	#NULL!	#NULL!
stt	B353-	2	.	#NULL!	#NULL!	#NULL!
stt	B355-	2	.	0	#NULL!	#NULL!
stt	B356-	2	.	1	#NULL!	#NULL!
stt	B361-	2	.	0	#NULL!	#NULL!
stt	B362-	2	.	0	#NULL!	#NULL!
stt	B363-	2	.	1	#NULL!	#NULL!
stt	B365-	2	.	0	#NULL!	#NULL!
stt	B368-	2	.	1	#NULL!	#NULL!
stt	B369-	2	.	0	#NULL!	#NULL!
stt	B370-	2	.	1	#NULL!	#NULL!
stt	B372-	2	.	1	#NULL!	#NULL!
stt	B374-	2	.	1	#NULL!	#NULL!
stt	B375-	2	.	2	#NULL!	#NULL!
stt	B376-	2	.	1	#NULL!	#NULL!
stt	B378-	2	.	#NULL!	#NULL!	#NULL!
stt	B383-	2	.	1	#NULL!	#NULL!
stt	B385-	2	.	1	#NULL!	#NULL!
stt	B388-	2	.	0	#NULL!	#NULL!
stt	B390-	2	.	0	#NULL!	#NULL!
stt	B395-	2	.	1	#NULL!	#NULL!
stt	B396-	2	.	2	#NULL!	#NULL!
stt	B397-	2	.	1	#NULL!	#NULL!
stt	B399-	2	.	0	#NULL!	#NULL!
stt	B400-	2	.	2	#NULL!	#NULL!
stt	B405-	2	.	0	#NULL!	#NULL!
stt	B406-	2	.	1	#NULL!	#NULL!
stt	B407-	2	.	1	#NULL!	#NULL!
stt	B411-	2	.	2	#NULL!	#NULL!
stt	B412-	2	.	2	#NULL!	#NULL!
stt	B413-	2	.	2	#NULL!	#NULL!
stt	B416-	2	.	1	#NULL!	#NULL!
stt	B418-	2	.	2	#NULL!	#NULL!
stt	B420A	2	.	1	#NULL!	#NULL!
stt	B422-	2	.	2	#NULL!	#NULL!
stt	B423-	2	.	1	#NULL!	#NULL!
stt	B424-	2	.	1	#NULL!	#NULL!
stt	B426-	2	.	1	#NULL!	#NULL!
stt	B428-	2	.	1	#NULL!	#NULL!
stt	B429-	2	.	1	#NULL!	#NULL!
stt	B433A	2	.	#NULL!	#NULL!	#NULL!
stt	B434-	2	.	#NULL!	#NULL!	#NULL!
stt	B435-	2	.	1	#NULL!	#NULL!
stt	B436-	2	.	1	#NULL!	#NULL!
stt	B437-	2	.	1	#NULL!	#NULL!
stt	B438-	2	.	2	#NULL!	#NULL!
stt	B442-	2	.	1	#NULL!	#NULL!
stt	B443-	2	.	2	#NULL!	#NULL!
stt	B446-	2	.	0	#NULL!	#NULL!
stt	B447-	2	.	1	#NULL!	#NULL!
stt	B449-	2	.	1	#NULL!	#NULL!
stt	B451-	2	.	1	#NULL!	#NULL!
stt	B452-	2	.	1	#NULL!	#NULL!
stt	B453-	2	.	1	#NULL!	#NULL!
stt	B461-	2	.	1	#NULL!	#NULL!
stt	B462-	2	.	0	#NULL!	#NULL!
stt	B464-	2	.	1	#NULL!	#NULL!
stt	B465-	2	.	1	#NULL!	#NULL!
stt	B466-	2	.	0	#NULL!	#NULL!
stt	B467-	2	.	1	#NULL!	#NULL!
stt	B468-	2	.	0	#NULL!	#NULL!
stt	B469-	2	.	1	#NULL!	#NULL!
stt	B470-	2	.	1	#NULL!	#NULL!
stt	B471-	2	.	1	#NULL!	#NULL!
stt	B472-	2	.	1	#NULL!	#NULL!
stt	B473-	2	.	0	#NULL!	#NULL!
stt	B475-	2	.	1	#NULL!	#NULL!
stt	B476-	2	.	0	#NULL!	#NULL!
stt	B477-	2	.	1	#NULL!	#NULL!
stt	B479-	2	.	1	#NULL!	#NULL!
stt	B480-	2	.	1	#NULL!	#NULL!
stt	B481-	2	.	1	#NULL!	#NULL!
stt	B483-	2	.	1	#NULL!	#NULL!
stt	B484-	2	.	1	#NULL!	#NULL!
stt	B485-	2	.	1	#NULL!	#NULL!
stt	B486-	2	.	1	#NULL!	#NULL!
stt	B486A	2	.	#NULL!	#NULL!	#NULL!
stt	B487-	2	.	1	#NULL!	#NULL!
stt	B488-	2	.	0	#NULL!	#NULL!
stt	B491-	2	.	0	#NULL!	#NULL!
stt	B494-	2	.	0	#NULL!	#NULL!
stt	B502-	2	.	1	#NULL!	#NULL!
stt	B503-	2	.	0	#NULL!	#NULL!
stt	B506-	2	.	#NULL!	#NULL!	#NULL!
stt	B507-	2	.	#NULL!	#NULL!	#NULL!
stt	B510-	2	.	#NULL!	#NULL!	#NULL!
stt	B511-	2	.	#NULL!	#NULL!	#NULL!
stt	B512-	2	.	1	#NULL!	#NULL!
stt	B512A	2	.	0	#NULL!	#NULL!
stt	B513-	2	.	1	#NULL!	#NULL!
stt	B514-	2	.	0	#NULL!	#NULL!
stt	B516-	2	.	1	#NULL!	#NULL!
stt	B517-	2	.	1	#NULL!	#NULL!
stt	B518-	2	.	1	#NULL!	#NULL!
stt	B519-	2	.	3	#NULL!	#NULL!
stt	B527A	2	.	2	#NULL!	#NULL!
stt	B529-	2	.	#NULL!	#NULL!	#NULL!
stt	B532-	2	.	0	#NULL!	#NULL!
stt	B533-	2	.	0	#NULL!	#NULL!
stt	B534-	2	.	1	#NULL!	#NULL!
stt	B537-	2	.	2	#NULL!	#NULL!
stt	B539-	2	.	1	#NULL!	#NULL!
stt	B540-	2	.	1	#NULL!	#NULL!
stt	B542-	2	.	1	#NULL!	#NULL!
stt	B544-	2	.	1	#NULL!	#NULL!
stt	B547-	2	.	1	#NULL!	#NULL!
stt	B548-	2	.	2	#NULL!	#NULL!
stt	B549-	2	.	0	#NULL!	#NULL!
stt	B053-	2	.	#NULL!	#NULL!	#NULL!
stt	B079-	2	.	#NULL!	#NULL!	#NULL!
stt	B146-	2	.	#NULL!	#NULL!	#NULL!
stt	B149-	2	.	#NULL!	#NULL!	#NULL!
stt	B185-	2	.	#NULL!	#NULL!	#NULL!
stt	B186-	2	.	#NULL!	#NULL!	#NULL!
stt	B211-	2	.	#NULL!	#NULL!	#NULL!
stt	B223-	2	.	#NULL!	#NULL!	#NULL!
stt	B306-	2	.	#NULL!	#NULL!	#NULL!
stt	B314A	2	.	#NULL!	#NULL!	#NULL!
stt	B329-	2	.	#NULL!	#NULL!	#NULL!
stt	B334A	2	.	#NULL!	#NULL!	#NULL!
stt	B379-	2	.	#NULL!	#NULL!	#NULL!
stt	B401-	2	.	#NULL!	#NULL!	#NULL!
stt	B432A	2	.	#NULL!	#NULL!	#NULL!
stt	B444-	2	.	#NULL!	#NULL!	#NULL!
stt	B458-	2	.	#NULL!	#NULL!	#NULL!
stt	B492-	2	.	#NULL!	#NULL!	#NULL!
stt	B525-	2	.	#NULL!	#NULL!	#NULL!
stt	B010-	2	.	#NULL!	#NULL!	#NULL!
stt	B022-	2	.	#NULL!	#NULL!	#NULL!
stt	B084-	2	.	#NULL!	#NULL!	#NULL!
stt	B090-	2	.	#NULL!	#NULL!	#NULL!
stt	B100B	2	.	#NULL!	#NULL!	#NULL!
stt	B154-	2	.	#NULL!	#NULL!	#NULL!
stt	B160-	2	.	#NULL!	#NULL!	#NULL!
stt	B216-	2	.	#NULL!	#NULL!	#NULL!
stt	B217-	2	.	#NULL!	#NULL!	#NULL!
stt	B219-	2	.	#NULL!	#NULL!	#NULL!
stt	B220-	2	.	#NULL!	#NULL!	#NULL!
stt	B224-	2	.	#NULL!	#NULL!	#NULL!
stt	B225-	2	.	#NULL!	#NULL!	#NULL!
stt	B232-	2	.	#NULL!	#NULL!	#NULL!
stt	B235-	2	.	#NULL!	#NULL!	#NULL!
stt	B241-	2	.	#NULL!	#NULL!	#NULL!
stt	B252-	2	.	#NULL!	#NULL!	#NULL!
stt	B253-	2	.	#NULL!	#NULL!	#NULL!
stt	B255-	2	.	#NULL!	#NULL!	#NULL!
stt	B256-	2	.	#NULL!	#NULL!	#NULL!
stt	B258-	2	.	#NULL!	#NULL!	#NULL!
stt	B284-	2	.	#NULL!	#NULL!	#NULL!
stt	B340-	2	.	#NULL!	#NULL!	#NULL!
stt	B387-	2	.	#NULL!	#NULL!	#NULL!
stt	B445-	2	.	#NULL!	#NULL!	#NULL!
stt	B460-	2	.	#NULL!	#NULL!	#NULL!
stt	B493-	2	.	#NULL!	#NULL!	#NULL!
stt	B003-	2	.	#NULL!	#NULL!	#NULL!
stt	B004-	2	.	#NULL!	#NULL!	#NULL!
stt	B005-	2	.	#NULL!	#NULL!	#NULL!
stt	B005A	2	.	#NULL!	#NULL!	#NULL!
stt	B006-	2	.	#NULL!	#NULL!	#NULL!
stt	B007-	2	.	#NULL!	#NULL!	#NULL!
stt	B008-	2	.	#NULL!	#NULL!	#NULL!
stt	B013-	2	.	#NULL!	#NULL!	#NULL!
stt	B014-	2	.	#NULL!	#NULL!	#NULL!
stt	B016A	2	.	#NULL!	#NULL!	#NULL!
stt	B017-	2	.	#NULL!	#NULL!	#NULL!
stt	B020A	2	.	#NULL!	#NULL!	#NULL!
stt	B020B	2	.	#NULL!	#NULL!	#NULL!
stt	B023-	2	.	#NULL!	#NULL!	#NULL!
stt	B024-	2	.	#NULL!	#NULL!	#NULL!
stt	B027-	2	.	#NULL!	#NULL!	#NULL!
stt	B033-	2	.	#NULL!	#NULL!	#NULL!
stt	B034-	2	.	#NULL!	#NULL!	#NULL!
stt	B038-	2	.	#NULL!	#NULL!	#NULL!
stt	B041-	2	.	#NULL!	#NULL!	#NULL!
stt	B044-	2	.	#NULL!	#NULL!	#NULL!
stt	B046-	2	.	#NULL!	#NULL!	#NULL!
stt	B052-	2	.	#NULL!	#NULL!	#NULL!
stt	B055-	2	.	#NULL!	#NULL!	#NULL!
stt	B057-	2	.	#NULL!	#NULL!	#NULL!
stt	B060-	2	.	#NULL!	#NULL!	#NULL!
stt	B062-	2	.	#NULL!	#NULL!	#NULL!
stt	B063-	2	.	#NULL!	#NULL!	#NULL!
stt	B064-	2	.	#NULL!	#NULL!	#NULL!
stt	B065-	2	.	#NULL!	#NULL!	#NULL!
stt	B066-	2	.	#NULL!	#NULL!	#NULL!
stt	B069-	2	.	#NULL!	#NULL!	#NULL!
stt	B070-	2	.	#NULL!	#NULL!	#NULL!
stt	B072-	2	.	#NULL!	#NULL!	#NULL!
stt	B073-	2	.	#NULL!	#NULL!	#NULL!
stt	B075-	2	.	#NULL!	#NULL!	#NULL!
stt	B080-	2	.	#NULL!	#NULL!	#NULL!
stt	B081-	2	.	#NULL!	#NULL!	#NULL!
stt	B082-	2	.	#NULL!	#NULL!	#NULL!
stt	B083-	2	.	#NULL!	#NULL!	#NULL!
stt	B083A	2	.	#NULL!	#NULL!	#NULL!
stt	B085-	2	.	1	#NULL!	#NULL!
stt	B088-	2	.	#NULL!	#NULL!	#NULL!
stt	B091-	2	.	#NULL!	#NULL!	#NULL!
stt	B092-	2	.	#NULL!	#NULL!	#NULL!
stt	B093-	2	.	#NULL!	#NULL!	#NULL!
stt	B094-	2	.	#NULL!	#NULL!	#NULL!
stt	B100A	2	.	#NULL!	#NULL!	#NULL!
stt	B102-	2	.	#NULL!	#NULL!	#NULL!
stt	B104-	2	.	#NULL!	#NULL!	#NULL!
stt	B105-	2	.	#NULL!	#NULL!	#NULL!
stt	B105A	2	.	#NULL!	#NULL!	#NULL!
stt	B106-	2	.	#NULL!	#NULL!	#NULL!
stt	B107-	2	.	#NULL!	#NULL!	#NULL!
stt	B107A	2	.	#NULL!	#NULL!	#NULL!
stt	B109-	2	.	#NULL!	#NULL!	#NULL!
stt	B110-	2	.	#NULL!	#NULL!	#NULL!
stt	B113-	2	.	#NULL!	#NULL!	#NULL!
stt	B116-	2	.	#NULL!	#NULL!	#NULL!
stt	B118-	2	.	#NULL!	#NULL!	#NULL!
stt	B119-	2	.	#NULL!	#NULL!	#NULL!
stt	B120-	2	.	#NULL!	#NULL!	#NULL!
stt	B123-	2	.	#NULL!	#NULL!	#NULL!
stt	B125-	2	.	#NULL!	#NULL!	#NULL!
stt	B126-	2	.	#NULL!	#NULL!	#NULL!
stt	B127-	2	.	#NULL!	#NULL!	#NULL!
stt	B129-	2	.	#NULL!	#NULL!	#NULL!
stt	B132A	2	.	#NULL!	#NULL!	#NULL!
stt	B134-	2	.	#NULL!	#NULL!	#NULL!
stt	B140-	2	.	#NULL!	#NULL!	#NULL!
stt	B141-	2	.	#NULL!	#NULL!	#NULL!
stt	B142-	2	.	#NULL!	#NULL!	#NULL!
stt	B143-	2	.	#NULL!	#NULL!	#NULL!
stt	B144-	2	.	#NULL!	#NULL!	#NULL!
stt	B145-	2	.	#NULL!	#NULL!	#NULL!
stt	B147-	2	.	#NULL!	#NULL!	#NULL!
stt	B148-	2	.	#NULL!	#NULL!	#NULL!
stt	B152-	2	.	#NULL!	#NULL!	#NULL!
stt	B153-	2	.	#NULL!	#NULL!	#NULL!
stt	B155-	2	.	#NULL!	#NULL!	#NULL!
stt	B158-	2	.	#NULL!	#NULL!	#NULL!
stt	B162-	2	.	#NULL!	#NULL!	#NULL!
stt	B163-	2	.	#NULL!	#NULL!	#NULL!
stt	B164-	2	.	#NULL!	#NULL!	#NULL!
stt	B166-	2	.	#NULL!	#NULL!	#NULL!
stt	B173-	2	.	#NULL!	#NULL!	#NULL!
stt	B173A	2	.	#NULL!	#NULL!	#NULL!
stt	B174-	2	.	#NULL!	#NULL!	#NULL!
stt	B175-	2	.	#NULL!	#NULL!	#NULL!
stt	B177-	2	.	#NULL!	#NULL!	#NULL!
stt	B180-	2	.	#NULL!	#NULL!	#NULL!
stt	B184-	2	.	#NULL!	#NULL!	#NULL!
stt	B187-	2	.	#NULL!	#NULL!	#NULL!
stt	B189-	2	.	#NULL!	#NULL!	#NULL!
stt	B190-	2	.	#NULL!	#NULL!	#NULL!
stt	B195-	2	.	#NULL!	#NULL!	#NULL!
stt	B197-	2	.	1	#NULL!	#NULL!
stt	B198-	2	.	#NULL!	#NULL!	#NULL!
stt	B200-	2	.	#NULL!	#NULL!	#NULL!
stt	B201-	2	.	#NULL!	#NULL!	#NULL!
stt	B202-	2	.	#NULL!	#NULL!	#NULL!
stt	B203-	2	.	#NULL!	#NULL!	#NULL!
stt	B205-	2	.	#NULL!	#NULL!	#NULL!
stt	B207-	2	.	#NULL!	#NULL!	#NULL!
stt	B208-	2	.	#NULL!	#NULL!	#NULL!
stt	B212-	2	.	#NULL!	#NULL!	#NULL!
stt	B213-	2	.	#NULL!	#NULL!	#NULL!
stt	B214-	2	.	#NULL!	#NULL!	#NULL!
stt	B215-	2	.	#NULL!	#NULL!	#NULL!
stt	B218-	2	.	#NULL!	#NULL!	#NULL!
stt	B221-	2	.	#NULL!	#NULL!	#NULL!
stt	B222A	2	.	#NULL!	#NULL!	#NULL!
stt	B230-	2	.	#NULL!	#NULL!	#NULL!
stt	B233-	2	.	#NULL!	#NULL!	#NULL!
stt	B236-	2	.	#NULL!	#NULL!	#NULL!
stt	B236A	2	.	#NULL!	#NULL!	#NULL!
stt	B237-	2	.	#NULL!	#NULL!	#NULL!
stt	B238-	2	.	#NULL!	#NULL!	#NULL!
stt	B239-	2	.	#NULL!	#NULL!	#NULL!
stt	B240-	2	.	#NULL!	#NULL!	#NULL!
stt	B244-	2	.	#NULL!	#NULL!	#NULL!
stt	B245A	2	.	#NULL!	#NULL!	#NULL!
stt	B245B	2	.	#NULL!	#NULL!	#NULL!
stt	B247-	2	.	#NULL!	#NULL!	#NULL!
stt	B254-	2	.	#NULL!	#NULL!	#NULL!
stt	B257-	2	.	#NULL!	#NULL!	#NULL!
stt	B259-	2	.	#NULL!	#NULL!	#NULL!
stt	B261-	2	.	#NULL!	#NULL!	#NULL!
stt	B262A	2	.	#NULL!	#NULL!	#NULL!
stt	B264-	2	.	#NULL!	#NULL!	#NULL!
stt	B265-	2	.	#NULL!	#NULL!	#NULL!
stt	B266-	2	.	#NULL!	#NULL!	#NULL!
stt	B267-	2	.	#NULL!	#NULL!	#NULL!
stt	B269-	2	.	#NULL!	#NULL!	#NULL!
stt	B270-	2	.	#NULL!	#NULL!	#NULL!
stt	B270A	2	.	#NULL!	#NULL!	#NULL!
stt	B271-	2	.	#NULL!	#NULL!	#NULL!
stt	B272A	2	.	#NULL!	#NULL!	#NULL!
stt	B273-	2	.	#NULL!	#NULL!	#NULL!
stt	B275-	2	.	#NULL!	#NULL!	#NULL!
stt	B276-	2	.	#NULL!	#NULL!	#NULL!
stt	B278-	2	.	#NULL!	#NULL!	#NULL!
stt	B279-	2	.	#NULL!	#NULL!	#NULL!
stt	B280-	2	.	#NULL!	#NULL!	#NULL!
stt	B280A	2	.	#NULL!	#NULL!	#NULL!
stt	B280B	2	.	#NULL!	#NULL!	#NULL!
stt	B285-	2	.	#NULL!	#NULL!	#NULL!
stt	B286-	2	.	#NULL!	#NULL!	#NULL!
stt	B288-	2	.	#NULL!	#NULL!	#NULL!
stt	B289-	2	.	#NULL!	#NULL!	#NULL!
stt	B290A	2	.	#NULL!	#NULL!	#NULL!
stt	B290B	2	.	#NULL!	#NULL!	#NULL!
stt	B291-	2	.	#NULL!	#NULL!	#NULL!
stt	B293-	2	.	#NULL!	#NULL!	#NULL!
stt	B296-	2	.	#NULL!	#NULL!	#NULL!
stt	B299-	2	.	#NULL!	#NULL!	#NULL!
stt	B318-	2	.	#NULL!	#NULL!	#NULL!
stt	B319-	2	.	#NULL!	#NULL!	#NULL!
stt	B320A	2	.	#NULL!	#NULL!	#NULL!
stt	B320B	2	.	#NULL!	#NULL!	#NULL!
stt	B320C	2	.	#NULL!	#NULL!	#NULL!
stt	B321-	2	.	#NULL!	#NULL!	#NULL!
stt	B322-	2	.	#NULL!	#NULL!	#NULL!
stt	B323-	2	.	#NULL!	#NULL!	#NULL!
stt	B324-	2	.	#NULL!	#NULL!	#NULL!
stt	B325-	2	.	#NULL!	#NULL!	#NULL!
stt	B326-	2	.	#NULL!	#NULL!	#NULL!
stt	B326A	2	.	#NULL!	#NULL!	#NULL!
stt	B327B	2	.	#NULL!	#NULL!	#NULL!
stt	B327A	2	.	#NULL!	#NULL!	#NULL!
stt	B328-	2	.	#NULL!	#NULL!	#NULL!
stt	B331-	2	.	#NULL!	#NULL!	#NULL!
stt	B332-	2	.	#NULL!	#NULL!	#NULL!
stt	B333-	2	.	#NULL!	#NULL!	#NULL!
stt	B337-	2	.	#NULL!	#NULL!	#NULL!
stt	B338-	2	.	#NULL!	#NULL!	#NULL!
stt	B341A	2	.	#NULL!	#NULL!	#NULL!
stt	B342A	2	.	#NULL!	#NULL!	#NULL!
stt	B344-	2	.	#NULL!	#NULL!	#NULL!
stt	B344A	2	.	#NULL!	#NULL!	#NULL!
stt	B346-	2	.	#NULL!	#NULL!	#NULL!
stt	B347-	2	.	#NULL!	#NULL!	#NULL!
stt	B348-	2	.	#NULL!	#NULL!	#NULL!
stt	B349-	2	.	#NULL!	#NULL!	#NULL!
stt	B350-	2	.	#NULL!	#NULL!	#NULL!
stt	B352-	2	.	#NULL!	#NULL!	#NULL!
stt	B354-	2	.	#NULL!	#NULL!	#NULL!
stt	B357-	2	.	#NULL!	#NULL!	#NULL!
[truncated: 10,613 more rows]
